# Supplementary material for: Impact of a multifactorial treatment programme on clinical outcomes and cardiovascular risk estimates: a retrospective cohort study from a specialised diabetes centre in Denmark
Source: PubMed Central journal article supplement — BMJ Open. 2018 Mar 17;8(3):e019214. doi: 10.1136/bmjopen-2017-019214 (PMC5875668; doi:10.1136/bmjopen-2017-019214), 2018-03-17
Supplement: bmjopen-2017-019214.draft_revisions.pdf [file bmjopen-2017-019214.draft_revisions.pdf]

# BMJ Open

BMJ Open is committed to open peer review. As part of this commitment we make the peer review history of every article we publish publicly available.

When an article is published we post the peer reviewers' comments and the authors' responses online. We also post the versions of the paper that were used during peer review. These are the versions that the peer review comments apply to.

The versions of the paper that follow are the versions that were submitted during the peer review process. They are not the versions of record or the final published versions. They should not be cited or distributed as the published version of this manuscript.

BMJ Open is an open access journal and the full, final, typeset and author-corrected version of record of the manuscript is available on our site with no access controls, subscription charges or pay-per-view fees (<http://bmjopen.bmj.com>).

If you have any questions on BMJ Open's open peer review process please email [info.bmjopen@bmj.com](mailto:info.bmjopen@bmj.com)

# BMJ Open

## Impact of a short term multifactorial treatment program on clinical outcomes and cardiovascular risk estimates: a retrospective cohort study

|                                 |                                                                                                                                                                                                                                                                                                                                                                                 |
|---------------------------------|---------------------------------------------------------------------------------------------------------------------------------------------------------------------------------------------------------------------------------------------------------------------------------------------------------------------------------------------------------------------------------|
| Journal:                        | <i>BMJ Open</i>                                                                                                                                                                                                                                                                                                                                                                 |
| Manuscript ID                   | bmjopen-2017-019214                                                                                                                                                                                                                                                                                                                                                             |
| Article Type:                   | Research                                                                                                                                                                                                                                                                                                                                                                        |
| Date Submitted by the Author:   | 17-Aug-2017                                                                                                                                                                                                                                                                                                                                                                     |
| Complete List of Authors:       | Safai, Narges; Steno Diabetes Center Copenhagen, Patient Care<br>Carstensen, Bendix; Steno Diabetes Center Copenhagen, Department of Clinical Epidemiology<br>Vestergaard, Henrik; The Novo Nordisk Foundation, Center for Basic Metabolic Research, Section of Metabolic Genetics<br>Ridderstråle, Martin; Novo Nordisk AS; Lunds Universitet, Department of Clinical Sciences |
| <b>Primary Subject Heading</b>: | Diabetes and endocrinology                                                                                                                                                                                                                                                                                                                                                      |
| Secondary Subject Heading:      | Epidemiology, Diabetes and endocrinology, Medical management                                                                                                                                                                                                                                                                                                                    |
| Keywords:                       | Type 2 diabetes, Glycemic control, Outcomes, CVD risk, Multifactorial treatment                                                                                                                                                                                                                                                                                                 |
|                                 |                                                                                                                                                                                                                                                                                                                                                                                 |

SCHOLARONE™  
Manuscripts

Only

1  
2  
3  
4 **Title page**  
5

6  
7 **Impact of a short term multifactorial treatment program on clinical outcomes and**  
8  
9 **cardiovascular risk estimates: a retrospective cohort study**  
10

11  
12  
13  
14 5 Narges Safai<sup>a</sup>, Bendix Carstensen<sup>b</sup>, Henrik Vestergaard<sup>c</sup> and Martin Ridderstråle<sup>d</sup>

15  
16 <sup>a</sup> Steno Diabetes Center Copenhagen, Gentofte, Denmark; narges.safai@regionh.dk

17  
18 <sup>b</sup> Steno Diabetes Center Copenhagen, Gentofte, Denmark; bendix.carstensen@regionh.dk

19  
20 <sup>c</sup> Novo Nordisk Foundation of Basic Metabolic Research, University of Copenhagen,  
21  
22 Denmark; Henrik.vestergaard@sund.ku.dk

23  
24 <sup>d</sup> Novo Nordisk A/S, Søborg, Denmark and Department of Clinical Sciences, Lund  
25  
26 University, Malmö, Sweden; mtrd@novonordisk.com  
27

28  
29  
30  
31 Corresponding author:

32  
33 14 Narges Safai, MD

34  
35 15 Steno Diabetes Center Copenhagen

36  
37 16 Niels Steensens Vej 2-4

38  
39 17 DK-2820 Gentofte

40  
41 18 Denmark

42  
43 19 +45 3091 3395 (direct)

44  
45 20 [narges.safai@regionh.dk](mailto:narges.safai@regionh.dk)

46  
47  
48 21 Number of tables: 2

49  
50 22 Number of figures: 3

51  
52  
53 23

1  
2  
3 **Abstract**

4 **Objectives:** To investigate the impact of a short term multifactorial treatment program in a  
5  
6 real-life setting on clinical outcomes and estimated cardiovascular disease (CVD) risk.

7  
8 **Design:** A retrospective observational cohort study, using data from the electronic medical  
9  
10 records and national registers.

11  
12 **Setting:** Tertiary diabetes center in Denmark.

13  
14 **Participants:** Patients with type 2 diabetes ( $n=4,299$ ) referred to a short term treatment  
15  
16 program between Jan 1<sup>st</sup> 2001 and April 1<sup>st</sup> 2016.

17  
18 **Outcomes:** Primary outcomes were HbA1c, blood pressure and LDL cholesterol and changes  
19  
20 in pharmacological treatment. Our secondary outcome was the impact on estimated CVD  
21  
22 risk.

23  
24 **Results:** The patients achieved a mean  $\pm$  SD decrease in HbA1c, systolic and diastolic blood  
25  
26 pressure (BP), and LDL cholesterol of  $1.16\pm 0.04\%$  ( $12.7\pm 0.4$  mmol/mol),  $6.3\pm 0.4$  mmHg,  
27  
28  $2.6\pm 0.2$  mmHg and  $0.40\pm 0.02$  mmol/l, respectively ( $p<0.0001$ ). The proportion of patients  
29  
30 who met the treatment goal for HbA1c ( $<7\%$  [ $<53$ mmol/mol]) increased from 31% to 58% ( $p$   
31  
32  $<0.0001$ ); for BP ( $<130/80$  mm Hg) from 24% to 34% ( $p <0.0001$ ), and for LDL cholesterol  
33  
34 ( $<2.5$  mmol/l (patients without previous CVD) or  $<1.8$  mmol/l (patients with previous CVD))  
35  
36 from 52% to 65%. Those reaching all three guideline treatment targets increased from 4% to  
37  
38 15% ( $p<0.0001$ ), and when relaxing the BP target to  $<140/85$  from 8% to 24%. The estimated  
39  
40 CVD risk was relatively reduced by 15.2% using the Swedish NDR Risk Engine and 30.9%  
41  
42 using the UKPDS risk engine.

43  
44 **Conclusions:** Our data support that short term multifactorial treatment of patients with  
45  
46 glycemic dysregulation in a specialist outpatient setting is both achievable and effective, and  
47  
48 associated with a clinically meaningful improvement in CVD risk.  
49  
50  
51  
52  
53  
54  
55  
56  
57  
58  
59  
60

1  
2  
3 **1 Strengths and limitations of this study**  
4

- 5 2 • Large cohort of dysregulated patients with type 2 diabetes under real-world conditions  
6  
7 3 and strong validity of data with repeated recordings of clinical measurements and  
8  
9 4 access to national registries.  
10  
11 5 • Selection bias in terms of more motivated and high risk patients being referred to the  
12  
13 6 clinic, and by exclusion of those who did not show up.  
14  
15  
16 7 • The use risk engines can only give an estimate of the CVD risk and the UKPDS risk  
17  
18 8 engine is based on a population many years prior to ours where treatment guidelines  
19  
20 9 were different.  
21  
22  
23  
24  
25  
26  
27  
28  
29  
30  
31  
32  
33  
34  
35  
36  
37  
38  
39  
40  
41  
42  
43  
44  
45  
46  
47  
48  
49  
50  
51  
52  
53  
54  
55  
56  
57  
58  
59  
60

11 **Keywords:** Type 2 diabetes, glycaemic control, outcomes, CVD risk and multifactorial  
12 treatment  
13  
14  
15  
16

## 1 **Introduction**

2 Type 2 diabetes is an increasing global health threat. It is estimated that 439 million people  
3 will be diagnosed with diabetes by 2030 (1). Type 2 diabetes is associated with an increased  
4 risk of microvascular complications such as nephropathy, neuropathy, and retinopathy as well  
5 as macrovascular disease, resulting in a decreased life expectancy and substantial personal  
6 and societal expenses (2). Ensuring good glycaemic control remains the most effective  
7 therapeutic measure to reduce the risk of developing microvascular disease (3, 4).

8 Multifactorial treatment with tight control of glycaemia, blood pressure (BP) and lipids,  
9 accompanied by acetylsalicylic acid and lifestyle advice, is known to reduce progression of  
10 microvascular complications, cardiovascular disease (CVD), and mortality by 50% in patients  
11 with type 2 diabetes and microalbuminuria (5-7). Consequently, diabetes guidelines have  
12 advocated an intensified treatment approach aiming at addressing and reducing all CVD risk  
13 factors in patients with diabetes since several years (8, 9).

14  
15 For most patients, sufficient glycaemic, BP and lipid control can be achieved in a primary care  
16 setting but in high risk patients, or in patients with complex treatment regimens, the  
17 proportion of patients who achieves metabolic control in primary care decreases (10, 11). In  
18 this situation, in most health care systems, high risk patients are referred to specialist clinics  
19 for evaluation. A broad risk factor intervention in this subgroup has proven particularly  
20 effective in the Steno-2 study (5). However, it remains unknown whether the results seen in  
21 the study setting can be achieved in clinical practice.

22  
23 The overall aim of this study was to describe how the multifactorial intervention methods  
24 from the Steno-2 study perform in a larger scale clinical setting. Our primary objective was to  
25 describe changes in metabolic outcomes and pharmacological treatment as a result of such

1 structured short term intervention. Our secondary objective was to evaluate the impact on  
2 estimated CVD risk by using two different risk assessment tools: the UKPDS Risk Engine  
3 (12), and the 5-year Swedish National Diabetes Registry (NDR) risk model (13).  
4

## 5 **Methods**

### 6 **Study Population**

7 This study is based on patients referred to Steno Diabetes Center, a tertiary multidisciplinary  
8 and highly specialized diabetes center in the Capital Region of Denmark. It serves as one out  
9 of three referral centers with a catchment area of over 1.7 million people and provides  
10 diabetes care on a permanent basis to about 5.600 patients. During the Steno-2 study, SDC  
11 designed a treatment program algorithm specifically for patients with type 2 diabetes and  
12 glycemic dysregulation. The primary goal of the program is to improve patient quality of life  
13 and reduce mortality by prevention of acute and chronic complications of diabetes. This is  
14 done by motivating and encouraging self-management, professional support in behavioral  
15 changes, and pharmacological treatment according to national and international guidelines.  
16 The SDC Type 2 Clinic (T2C) opened in 2001, providing care for patients referred from  
17 general practitioners (GPs) or other hospitals in the region. Patients were referred to the clinic  
18 either as newly diagnosed with a need for education and start of treatment, requiring a shift to  
19 insulin treatment, having micro- or macrovascular complications, or having glycemic  
20 dysregulation in spite of attempts to control the disease by the GP. The program, which is still  
21 running, involves a consultation with a nurse, a dietician, and a physician in a structured  
22 order with specific assignments and is comparable to the intensive treatment arm of the  
23 Steno-2 study (Figure 1). The individual visits are complemented by optional group-based  
24 theme sessions with the overall aim of facilitating patient empowerment. The treatment  
25 program consist of self-management training with a focus on knowledge, lifestyle behavior

1 including diet, physical activity and smoking cessation, skills to improve glycemic control  
2 such as self-monitoring of blood glucose and skills to prevent and identify complications.  
3 Furthermore, there is focus on pharmacological treatment of hyperglycemia, hypertension  
4 and dyslipidemia. After approximately eight months, patients were evaluated for referral back  
5 to their GP, or to continue at the SDC outpatient clinic. The structure of program has  
6 remained unchanged in the study period while e.g. medications used have followed updated  
7 treatment guidelines. We defined the baseline and evaluation follow-up visits as the first and  
8 last visit to the T2C, respectively. This study is a retrospective observational study with  
9 demographics, clinical, and laboratory information extracted from the electronic medical  
10 records and laboratory database of SDC. We included all patients who had finalized a  
11 treatment program between 1<sup>st</sup> of January 2001 and 1<sup>st</sup> of April 2016 ( $n = 4,489$ ), and to  
12 avoid no-shows, once off or very brief consultations we excluded patients with a treatment  
13 duration under 30 days (i.e. between the baseline and follow-up visits,  $n = 190$ ). We ended up  
14 with a total of  $n = 4,299$  patients. 16% of the patients were subsequently re-referred to the  
15 clinic, but we only included their first treatment program here.

#### 16 17 Anthropometric, clinical and biochemical measurements

18 Laboratory analyses at the baseline visit were encouraged to be fasting and included: glucose,  
19 HbA<sub>1c</sub>, hemoglobin, creatinine, total-cholesterol, high-density lipoprotein-cholesterol (HDL)  
20 cholesterol, low-density lipoprotein (LDL) cholesterol, triglycerides (TG), C-peptide and  
21 urine albumin. At all in-between visits and at follow-up an HbA<sub>1c</sub>, BP and weight were  
22 measured. All laboratory and anthropometric measurements were recorded using  
23 standardized procedures at the SDC accredited laboratory (ISO 15189). Body mass index  
24 (BMI) was calculated from weight and height ( $\text{kg/m}^2$ ). A person was considered overweight  
25 at  $\text{BMI} \geq 25 \text{ kg/m}^2$ , and obese at  $\text{BMI} \geq 30 \text{ kg/m}^2$ . For BP and heart rate automated



1  
2  
3 1 oscillometric blood pressure recorders were used (AND UA-787plus, A&D medical,  
4 California, USA). Smoking status was obtained at every visit.

5  
6  
7 3  
8  
9 4 Diabetes complications and treatment

10 5 Micro albuminuria was here defined as a morning urine sample with urine albumin of 30-300  
11 mg/L or urine albumin to creatinine ratio > 30 mg/g to 300 mg/g at the first visit. Macro

12 6 albuminuria likewise but with a value > 300 mg/L or > 300 mg/g. Peripheral neuropathy was  
13 7 defined by examining vibration sensation with a biothesiometer and using an age-adjusted

14 8 threshold (14). Information on cardiovascular disease was obtained from The National Patient  
15 9 Register and included diagnosis from 1977 till 2015 and procedures from 1995 till 2015.

16 10 Prior CVD was defined as one or more of the following: myocardial infarction, heart surgery,  
17 11 ischaemic heart disease, heart insufficiency, atrial fibrillation, vascular surgery, stroke,  
18 12 transitory cerebral ischaemia and amputations using ICD-8 and ICD-10 codes.

19 13 Information on medication was obtained by Register of Medicinal Products Statistics, where  
20 14 individual-level data on all prescription drugs sold in Danish community pharmacies since  
21 15 1994 has been recorded and administered by Statistics Denmark (15). A person was defined  
22 16 as being on a treatment at baseline if they had purchased a prescribed drug less than 180 days  
23 17 before their first visit and at follow-up if they purchased a prescribed drug after their first  
24 18 visit and less than 30 days after their last visit.

25 19 Permission to use data from the patient register was obtained from the Danish Data Protection  
26 20 Agency (ref. number: 2007-58-0015) and from the Danish Patient Safety Authority.

27  
28  
29  
30  
31  
32  
33  
34  
35  
36  
37  
38  
39  
40  
41  
42  
43 22  
44 23 Statistical methods

45 24 We investigated how many patients reached the recommended targets for HbA1c (A), BP (B)  
46 25 and LDL cholesterol (C) according to national guidelines (16), collectively referred to as

1  
2  
3 1 ABC control: HbA<sub>1c</sub> < 7% (< 53 mmol/mol), BP < 130/80 mm Hg and LDL cholesterol <  
4  
5 2 2.5 mmol/l (< 100 mg/dl, patients without previous CVD) or < 1.8 mmol/l (< 70 mg/dl,  
6  
7 3 patients with previous CVD). The primary outcomes were changes in blood glucose control  
8  
9 4 (HbA<sub>1c</sub>), BP and lipids from first visit (baseline) to end of treatment (follow-up evaluation  
10  
11 5 visit). Secondary outcomes were the proportion of patients achieving the recommended  
12  
13 6 targets for A, B or C and all three, ABC. For blood lipids, the T2C program assumed they  
14  
15 7 would not deteriorate if they were on target at baseline and measurements were only repeated  
16  
17 8 in case they were not at target at baseline. Accordingly, for this analysis a last observation  
18  
19 9 carried forward approach was used to impute missing data. To evaluate the effect of changes  
20  
21 10 in metabolic outcomes on the estimated risk of CVD, we calculated CVD risk at baseline and  
22  
23 11 at follow-up using two different risk assessment tools: a Swedish risk model specific for type  
24  
25 12 2 diabetes (13) and the UKPDS Risk Engine (12). The Swedish model is based on patients  
26  
27 13 with type 2 diabetes using 12 predictors derived from a large observational sample of patients  
28  
29 14 ( $n = 24,288$ ) in the Swedish National Diabetes Register (NDR) followed from 2002 to 2007  
30  
31 15 and estimates the 5-year risk of CVD. The UKPDS Risk Engine is also type 2 diabetes-  
32  
33 16 specific and based on 4,540 patients from the UKPDS trial (1977 to 1991). It includes HbA<sub>1c</sub>  
34  
35 17 as a continuous variable and calculates the risk of developing a new coronary heart disease  
36  
37 18 (CHD) event. *T* test was used for gender differences. Comparison between baseline and  
38  
39 19 follow-up was made using mixed model for repeated measurements (MMRM) for continuous  
40  
41 20 variables and logistic regression for dichotomous variables. McNemar test was used to  
42  
43 21 compare changes in categorical variables. For risk estimates, exact 95%-confidence intervals  
44  
45 22 (CI) were calculated. SAS Enterprise Guide 7.1 (SAS Institute, Cary, NC) was used for  
46  
47 23 database management and all of the above-mentioned analyses.  
48  
49  
50  
51  
52  
53  
54  
55  
56  
57  
58  
59  
60

## 25 **Results**

## 1 Study cohort characteristics

2 Baseline characteristics of the study cohort are shown in Table 1. The majority of patients  
3 were Caucasians, and 19% were diagnosed with diabetes within a year before their referral.  
4 There were more males ( $n = 2,567$ ) than females ( $n = 1,732$ ) but no difference in treatment  
5 duration: median treatment program duration was 8.4 months (IQR: 6.1, 11.3). There were  
6 more male smokers and ex-smokers. Males had a higher level of HbA<sub>1c</sub>, BP, weight and TG  
7 but lower BMI and cholesterol levels at baseline (Table 1).

## 9 Metabolic outcomes

10 There was a significant decrease in HbA<sub>1c</sub> between baseline and follow-up of  $1.0 \pm 0.04\%$   
11 ( $10.6 \pm 0.4$  mmol/mol), with no gender difference. The decrease in systolic BP was  $6.3 \pm 0.4$   
12 mm Hg and in diastolic BP  $2.7 \pm 0.2$  mm Hg ( $p < 0.0001$  for both). The effect of treatment on  
13 BP was the same in both genders. There was a significant decrease in total-cholesterol, LDL  
14 and TG of  $0.39 \pm 0.03$  mmol/l,  $0.32 \pm 0.02$  mmol/l and  $0.22 \pm 0.05$  mmol/l, respectively.  
15 There was no change in HDL levels overall ( $p = 0.2$ ). As expected, females had higher HDL  
16 levels than males, both at baseline and at follow-up ( $p < 0.0001$ ). This gender difference was  
17 also seen for total- and LDL cholesterol levels where females had higher levels at both  
18 baseline and follow-up. The effect of treatment on lipid levels was equal in both genders.

## 20 ABC control

21 In general, the proportion of patients achieving full ABC control according to national  
22 guideline treatment targets (HbA<sub>1c</sub>  $< 7\%$  [ $< 53$  mmol/mol]), LDL  $< 2.5$  mmol/l ( $< 100$  mg/dl,  
23 patients without previous CVD) or  $< 1.8$  mmol/l ( $< 70$  mg/dl, patients with previous CVD),  
24 and BP  $< 130/80$  mm Hg) increased from 4% to 15% ( $p < 0.0001$ ). More females were  
25 achieving all three treatment targets at both baseline ( $p = 0.047$ ) and at follow-up ( $p = 0.014$ ).

1 Patients achieving the HbA<sub>1c</sub> target increased from 31% to 58% ( $p < 0.0001$ ), the BP target  
2 from 24% to 34% ( $p < 0.0001$ ), and the LDL target from 52% to 65% ( $p = 0.002$ , Figure 2).  
3 If the BP target was relaxed from  $< 130/80$  mm Hg to  $< 140/85$  mm Hg the percentage  
4 achieving the BP target increased from 43% at baseline to 58% at follow-up ( $p < 0.0001$ ),  
5 and consequently full ABC control from 8% at baseline to 24% at follow-up ( $p < 0.0001$ ).

### 6 7 Changes in pharmacological treatment

8 The most common antidiabetic drug at baseline was metformin, which 58.4% of the patients  
9 were on, followed by sulphonyl urea (SU), 38.4%, and insulin, 19.5% (Figure 3). Only a  
10 small proportion of patients were on dipeptidyl peptidase 4 (DPP-4) inhibitors, 7.0%,  
11 glucagon-like peptide 1 (GLP-1) analogues, 3.9%, or other antidiabetic drug, 4.2%. In  
12 general there was an increase in the use of medication during the program. The largest  
13 increase was seen in use of metformin to 75.3%, insulin to 36.9% and GLP1-analogues to  
14 11.6%. While SU only increased slightly to 41.8%, DPP-4 inhibitors to 9.6% and other  
15 antidiabetics 4.3%.

16 As part of the multifactorial treatment program, we also observed an increase in use of  
17 antihypertensive drugs to 75.3%, lipid lowering drugs to 75.9% and acetylsalicylic acid  
18 (ASA) to 69.6%.

### 19 20 Changes in cardiovascular risk

21 Estimated baseline and follow-up cardiovascular risk according to the used risk engines are  
22 shown in Table 2. Using the Swedish NDR model which predicts the 5 year risk of a new  
23 CVD event in a diabetic population, we observed a relative risk reduction of 15.2% (95% CI:  
24 14.5-15.9). The UKPDS risk engine showed a relative risk reduction of 30.9% (95% CI:  
25 30.3-31.5) in the 5 year CHD risk estimate. Females had a lower risk than males both at

1  
2  
3 1 baseline and at follow-up according to both risk models ( $p < 0.0001$ ). Meanwhile, both  
4  
5 2 according to the Swedish NDR model and the UKPDS risk engine, females had a smaller  
6  
7 3 relative risk reduction compared to males ( $p < 0.0001$ ).  
8  
9 4

## 11 5 **Discussion**

13 6 This study shows that a short term targeted multifactorial treatment program in a specialized  
14  
15 7 clinical setting can improve metabolic outcome measures and CVD risk in patients with type  
16  
17 8 2 diabetes and high prevalence of complications. This confirms that multifactorial treatment  
18  
19 9 not only works in a clinical study setting, but is also feasible and effective in real world  
20  
21 10 clinical practice. With a specialized group of health care providers and a structured treatment  
22  
23 11 and educational program that focuses on lifestyle intervention, self-management training and  
24  
25 12 pharmacological treatment of hyperglycemia, hypertension and dyslipidemia, it is possible to  
26  
27 13 accomplish significant CVD risk reductions in a high risk population with diabetes.  
28  
29 14

### 33 15 **Treatment targets**

35 16 Intensive multifactorial intervention in high risk patients has previously been shown to reduce  
36  
37 17 CVD and mortality (7), and a recent 21 years follow-up of the Steno-2 study population  
38  
39 18 shows that patients in the intensive-therapy group survived for a median of 7.9 years longer  
40  
41 19 than the conventional-therapy group patients (17). Here we show that the same treatment  
42  
43 20 program also works in clinical practice in a more diverse population, and results in a  
44  
45 21 substantial reduction of 5- and 10-year CVD risk as estimated by two of the available and  
46  
47 22 commonly used risk engines. In terms of risk factor intervention, glucose control continuous  
48  
49 23 to be the greatest challenge to diabetes care. Nonetheless, all but 21% of patients changed  
50  
51 24 from a higher to a lower HbA<sub>1c</sub> category in this follow-up. For example, 84% of patients with  
52  
53 25 an HbA<sub>1c</sub> < 6.5% (< 48 mmol/mol) remained < 6.5% (< 48 mmol/mol) and 75% of patients  
54  
55  
56  
57  
58  
59  
60

1 with an HbA<sub>1c</sub> > 9% (> 75 mmol/mol) improved their HbA<sub>1c</sub> to ≤ 9% (≤ 75 mmol/mol).  
2 Importantly, the improvement in glycaemic control was not accompanied by a general  
3 increase in weight. In fact, although we found that 15% of those in the normal weight  
4 category shifted to the overweight category when comparing the changes in BMI categories,  
5 15% of those who were in the obese or overweight category dropped to a lower weight  
6 category. The weight gain observed in some patients is probably explained by the increased  
7 use of insulin, while weight loss in others can be explained by an increased use of GLP-1  
8 receptor agonist treatment in recent years along with lifestyle management including dietary  
9 and physical activity advice.

10  
11 With focus on hyperglycemia, hypertension and dyslipidemia, we found an increase in the  
12 proportion of patients achieving the recommended targets that are comparable to intervention  
13 studies (18, 19). Here, the relative proportion of patients achieving HbA<sub>1c</sub> < 53 mmol/mol  
14 (7%) nearly doubled, BP < 130/80 mm Hg increased by 42% and LDL < 2.5 mmol/l by 25%.  
15 The T2C treatment program in this complex high-risk cohort resulted in a higher prevalence  
16 of risk factors in control equal to what has been observed in the more general diabetes  
17 population in the National Health and Nutrition Examination Surveys (NHANES) from 2007  
18 to 2010 (20). The NHANES data differ in the way that their data was cross-sectional with  
19 participants with self-reported diabetes, without any distinction between type 1 and type 2,  
20 and with a different risk profile. Our population was more selected by being referred from  
21 their GP and requiring specialized care, which means they either had more comorbidities or a  
22 more complex treatment than the general patient with type 2 diabetes. For HbA<sub>1c</sub> 58% in our  
23 cohort achieved the treatment target vs 53% in the NHANES cohort and for LDL-cholesterol  
24 65% vs 56%, respectively. But for BP there was a big difference, 34% in our cohort vs. 51%  
25 in the NHANES cohort. This could be due to a higher prevalence of high BP in a group of

1 patients selected for complex disease with long duration. We did observe a time trend in the  
2 data as the proportion of patients achieving the stringent BP target increased from 23% in  
3 2001 to 44% in 2015. The same improvement trend over time was observed in the proportion  
4 of patients achieving all three ABC targets; 7% in 2001 increasing to an average of 16% from  
5 2006 and forward in our material and in the NHANES data from 7% in 1999-2002 to 19% in  
6 2007-2010.

### 7 8 Use of CVD risk engines

9 To estimate the CVD risk in patients with type 2 diabetes is helpful to follow-up on treatment  
10 and to target further measures to patients at risk. In this study we used two different CVD risk  
11 engines to estimate the effect of the treatment program. The UKPDS risk engine is diabetes-  
12 specific and has several advantages as it incorporates HbA<sub>1c</sub> and diabetes duration as  
13 continuous variables (12). However, it is still not ideal as it is based on the patients recruited  
14 by UKPDS for randomization in a clinical trial two decades ago before newer and more  
15 effective treatments were available or widely used (e.g. statins, angiotensin converting  
16 enzyme inhibitors and antidiabetic drugs). Accordingly, recent validation showed poor  
17 calibration and overestimation of the CHD risk (21). A model that seems more suitable for  
18 our population is the Swedish NDR risk model, which is based on a more recent and  
19 nationwide population, reflecting a more diverse population and taking into account the  
20 history of previous CVD and BMI. By using this model we found a relative reduction in the  
21 estimated 5-year CVD risk of 16%, after approximately eight months, despite the increase in  
22 age and diabetes duration. Notably, the fact that 26% of the patients had a prior CVD  
23 diagnosis at baseline reflects the high risk profile and complexity of the population that was  
24 referred to the treatment program. This of course does not normalise their actual risk, which  
25 will still be high, but can be a motivating factor for the patients that there are some

1  
2  
3 1 modifiable risk factors that can reduce their risk. In comparison, the population used in the  
4  
5 2 Swedish model had a mean risk of 11.9% and a 5-year risk of fatal/non-fatal CVD of more  
6  
7 3 than 10% is defined as high risk. According to this 92% of our population was in high risk at  
8  
9 4 baseline. The UKPDS risk engine which estimates the risk of the first CHD event in 5 or 10  
10  
11 5 years, gives a lower 5 and 10 year risk estimate at baseline than the Swedish model, 7.4% and  
12  
13 6 17.1% respectively. This is nearly the same as the 10-year risk found in a NHANES  
14  
15 7 population from 2007 to 2012 of 16.5% if no risk factors were in control and 10.2% if all risk  
16  
17 8 factors were in control when using the same risk engine (22).

19  
20 9 Interestingly, both the NDR and UKPDS risk engines estimated a higher CVD risk reduction  
21  
22 10 in males than in females. This, perhaps expected finding, can be due to a relatively greater  
23  
24 11 HbA<sub>1c</sub> reduction seen in males, which is used in both the NDR and the UKPDS risk engines.  
25  
26 12 However, this alone could not explain the whole difference, as the gender difference  
27  
28 13 remained significant after excluding HbA<sub>1c</sub> from the equation. This in spite a higher  
29  
30 14 percentage of females achieved the metabolic targets.  
31  
32

### 33 15

### 34 16 Strengths and limitations

35  
36  
37 17 Strengths of this study include the validity of data with repeated recordings of the HbA<sub>1c</sub> and  
38  
39 18 BP at each visit, and that it includes a large cohort of patients treated under real-life  
40  
41 19 conditions such that results might have greater external validity than the highly selected  
42  
43 20 populations in randomized controlled trials (RCT). Still, we cannot rule out that there might  
44  
45 21 be a selection bias in terms of more motivated patients being referred to the clinic, and by  
46  
47 22 exclusion of those who did not show up.

48  
49  
50 23 As a result of using a database and a register, we do not have complete data on all patients  
51  
52 24 and therefore the cohort size changes a bit as results are based on those without missing  
53  
54 25 values. Another limitation is that there is a lack of patient reported outcomes, such as adverse  
55  
56  
57  
58  
59  
60



1  
2  
3 1 events of drugs and general well-being. This was not possible to extract from the electronic  
4  
5 2 medical records. Furthermore we cannot be sure that the patients going through a treatment  
6  
7 3 program actually completed the program or was discharged for other reasons. It is also  
8  
9 4 important to acknowledge that most of the treatment programs analyzed here were completed  
10  
11 5 before many of the new anti-diabetic treatments, as GLP1-analogs and sodium-glucose co-  
12  
13 6 transporter 2 (SGLT2)-inhibitors, were widely used and before acceptance of a more  
14  
15 7 personalized treatment as recommended in the position statement from ADA and EASD in  
16  
17 8 2012 (23). Another limitation of this study is the use risk engines that only give an estimate  
18  
19 9 of the CVD risk and that UKPDS is based on a population many years prior to ours and  
20  
21 10 treatment guidelines were not the same.  
22  
23  
24 11 Meanwhile, the data serves as a baseline benchmark for real world data studies as to what can  
25  
26 12 be achieved in routine clinical practice before these treatments and guidelines get wider use  
27  
28 13 and implementation. The use of a more individualized treatment approach with involvement  
29  
30 14 of the patient in decision making is increasingly used in the treatment programs at the  
31  
32 15 moment and is expected to increase adherence to therapy. Furthermore, the combination of a  
33  
34 16 more individualized HbA<sub>1c</sub> target and a broader selection of antidiabetic, antihypertensive  
35  
36 17 and dyslipidemia treatment will likely increase the proportion of patients achieving their  
37  
38 18 treatment goals and thereby reduce their CVD risk and mortality. Specifically, since the  
39  
40 19 EMPA-REG OUTCOME trial showed a 38% and the LEADER trial a 22% relative risk  
41  
42 20 reduction in deaths from CVD events (24, 25) in patients with type 2 diabetes and a high risk  
43  
44 21 of cardiovascular events, this gives us further treatment options in this patient group.  
45  
46 22 Therefore constant evaluation of the effects of our treatments on the risk of CVD or mortality  
47  
48 23 is necessary. Combining these drugs, the treatment program evaluated here, and an  
49  
50 24 individualized approach would be a logical next step for future studies.  
51  
52  
53  
54  
55  
56  
57  
58  
59  
60

1  
2  
3 1 Conclusion

4  
5 2 This study of patients with type 2 diabetes who undergo structured treatment program lasting  
6  
7 3 less than one year show that it is possible to increase the proportion of patients achieving the  
8  
9 4 target levels for HbA<sub>1c</sub>, BP, and LDL, thereby reducing their estimated CVD and CHD risk.  
10  
11 5 To the strengths of such a structured program we count the focus on treatment targets by a  
12  
13 6 multidisciplinary team and the fact that it is time limited, which reduces clinical inertia and  
14  
15 7 costs. Our results show that intensive treatment is not only effective in the RCT setting, but  
16  
17 8 also in clinical practice and should encourage other health care systems to establish similar  
18  
19 9 programs.  
20  
21

22 10

23  
24 11  
25  
26  
27  
28  
29  
30  
31  
32  
33  
34  
35  
36  
37  
38  
39  
40  
41  
42  
43  
44  
45  
46  
47  
48  
49  
50  
51  
52  
53  
54  
55  
56  
57  
58  
59  
60

1  
2  
3 14  
5 2 **Conflicts of interest**

6  
7 3 NS, BC and HV were employed at Steno Diabetes Center A/S, now known as Steno Diabetes  
8  
9 4 Center Copenhagen and MR was employed there when the study was initiated. Steno  
10  
11 5 Diabetes Center A/S was a research hospital working in the Danish National Health Service  
12  
13 6 and owned by Novo Nordisk A/S. NS and BC own shares in Novo Nordisk A/S.

14  
15  
16 7 **Funding**

17  
18 8 This study has been funded by Innovation Fund Denmark

19  
20 9 **Contribution statement**

21  
22 10 NS and BC were responsible for data management and statistical analysis. NS and MR were  
23  
24 11 responsible for interpretation of data and writing of the article. HV was responsible  
25  
26 12 interpretation and critical revision of the article. All authors fully approved the final version  
27  
28 13 of the article.

29  
30  
31 14 **Data sharing statement**

32  
33 15 Clinical data will be available at request, but information on diagnosis and medication is not  
34  
35 16 allowed to be shared by the Danish National Patient Register or Statistics Denmark.

36  
37  
38  
39 17  
40 18 **Uncategorized References**

- 41  
42 19 1. Guariguata L, Whiting DR, Hambleton I, Beagley J, Linnenkamp U, Shaw JE.  
43 20 Global estimates of diabetes prevalence for 2013 and projections for 2035. *Diabetes*  
44 21 *research and clinical practice*. 2014;103(2):137-49.  
45 22 2. Sarwar N, Gao P, Seshasai SR, Gobin R, Kaptoge S, Di Angelantonio E, et  
46 23 al. Diabetes mellitus, fasting blood glucose concentration, and risk of vascular disease: a  
47 24 collaborative meta-analysis of 102 prospective studies. *Lancet*. 2010;375(9733):2215-  
48 25 22.  
49 26 3. Holman RR, Paul SK, Bethel MA, Matthews DR, Neil HA. 10-year follow-up of  
50 27 intensive glucose control in type 2 diabetes. *The New England journal of medicine*.  
51 28 2008;359(15):1577-89.  
52 29 4. UKPDS. Effect of intensive blood-glucose control with metformin on  
53 30 complications in overweight patients with type 2 diabetes (UKPDS 34). *UK Prospective*  
54 31 *Diabetes Study (UKPDS) Group. Lancet*. 1998;352(9131):854-65.  
55 32 5. Gaede P, Vedel P, Larsen N, Jensen GV, Parving HH, Pedersen O.  
56 33 Multifactorial intervention and cardiovascular disease in patients with type 2 diabetes.  
57 34 *The New England journal of medicine*. 2003;348(5):383-93.

- 1 6. UKPDS. Intensive blood-glucose control with sulphonylureas or insulin  
2 compared with conventional treatment and risk of complications in patients with type 2  
3 diabetes (UKPDS 33). UK Prospective Diabetes Study (UKPDS) Group. *Lancet*.  
4 1998;352(9131):837-53.
- 5 7. Gaede P, Lund-Andersen H, Parving HH, Pedersen O. Effect of a  
6 multifactorial intervention on mortality in type 2 diabetes. *The New England journal of*  
7 *medicine*. 2008;358(6):580-91.
- 8 8. IDF Clinical Guidelines Task Force. Global guideline for Type 2  
9 diabetes. . Brussels: International Diabetes Federation; 2005.
- 10 9. Authors/Task Force M, Ryden L, Grant PJ, Anker SD, Berne C, Cosentino F,  
11 et al. ESC Guidelines on diabetes, pre-diabetes, and cardiovascular diseases developed  
12 in collaboration with the EASD: the Task Force on diabetes, pre-diabetes, and  
13 cardiovascular diseases of the European Society of Cardiology (ESC) and developed in  
14 collaboration with the European Association for the Study of Diabetes (EASD). *Eur Heart*  
15 *J*. 2013;34(39):3035-87.
- 16 10. Kotseva K, Wood D, De Backer G, De Bacquer D, Pyorala K, Reiner Z, et al.  
17 EUROASPIRE III. Management of cardiovascular risk factors in asymptomatic high-risk  
18 patients in general practice: cross-sectional survey in 12 European countries. *Eur J*  
19 *Cardiovasc Prev Rehabil*. 2010;17(5):530-40.
- 20 11. Alonso-Fernandez M, Mancera-Romero J, Mediavilla-Bravo JJ, Comas-  
21 Samper JM, Lopez-Simarro F, Perez-Unanua MP, et al. Glycemic control and use of A1c  
22 in primary care patients with type 2 diabetes mellitus. *Prim Care Diabetes*.  
23 2015;9(5):385-91.
- 24 12. Stevens RJ, Kothari V, Adler AI, Stratton IM, United Kingdom Prospective  
25 Diabetes Study G. The UKPDS risk engine: a model for the risk of coronary heart disease  
26 in Type II diabetes (UKPDS 56). *Clin Sci (Lond)*. 2001;101(6):671-9.
- 27 13. Zethelius B, Eliasson B, Eeg-Olofsson K, Svensson AM, Gudbjornsdottir S,  
28 Cederholm J, et al. A new model for 5-year risk of cardiovascular disease in type 2  
29 diabetes, from the Swedish National Diabetes Register (NDR). *Diabetes research and*  
30 *clinical practice*. 2011;93(2):276-84.
- 31 14. Bloom S, Till S, Sonksen P, Smith S. Use of a biothesiometer to measure  
32 individual vibration thresholds and their variation in 519 non-diabetic subjects. *Br Med J*  
33 *(Clin Res Ed)*. 1984;288(6433):1793-5.
- 34 15. Kildemoes HW, Sorensen HT, Hallas J. The Danish National Prescription  
35 Registry. *Scand J Public Health*. 2011;39(7 Suppl):38-41.
- 36 16. Sundhedsstyrelsen Center for Evaluering og Medicinsk Teknologivurdering.  
37 Type 2-diabetes. Medicinsk teknologivurdering af screening, diagnostik og behandling  
38 2003;5(1) [Available from:  
39 <https://www.sst.dk/~media/F42943CEAEC743DDAD8CB57FF55C9581.ashx>.
- 40 17. Gaede P, Oellgaard J, Carstensen B, Rossing P, Lund-Andersen H, Parving  
41 HH, et al. Years of life gained by multifactorial intervention in patients with type 2  
42 diabetes mellitus and microalbuminuria: 21 years follow-up on the Steno-2 randomised  
43 trial. *Diabetologia*. 2016.
- 44 18. Tight blood pressure control and risk of macrovascular and microvascular  
45 complications in type 2 diabetes: UKPDS 38. UK Prospective Diabetes Study Group. *BMJ*.  
46 1998;317(7160):703-13.
- 47 19. Griffin SJ, Borch-Johnsen K, Davies MJ, Khunti K, Rutten GE, Sandbaek A,  
48 et al. Effect of early intensive multifactorial therapy on 5-year cardiovascular outcomes  
49 in individuals with type 2 diabetes detected by screening (ADDITION-Europe): a cluster-  
50 randomised trial. *Lancet*. 2011;378(9786):156-67.
- 51 20. Stark Casagrande S, Fradkin JE, Saydah SH, Rust KF, Cowie CC. The  
52 prevalence of meeting A1C, blood pressure, and LDL goals among people with diabetes,  
53 1988-2010. *Diabetes Care*. 2013;36(8):2271-9.
- 54 21. Bannister CA, Poole CD, Jenkins-Jones S, Morgan CL, Elwyn G, Spasic I, et  
55 al. External validation of the UKPDS risk engine in incident type 2 diabetes: a need for  
56 new type 2 diabetes-specific risk equations. *Diabetes Care*. 2014;37(2):537-45.

- 1  
2  
3 1 22. Wong ND, Patao C, Malik S, Iloeje U. Preventable coronary heart disease  
4 2 events from control of cardiovascular risk factors in US adults with diabetes (projections  
5 3 from utilizing the UKPDS risk engine). *Am J Cardiol.* 2014;113(8):1356-61.  
6 4 23. Inzucchi SE, Bergenstal RM, Buse JB, Diamant M, Ferrannini E, Nauck M, et  
7 5 al. Management of hyperglycaemia in type 2 diabetes: a patient-centered approach.  
8 6 Position statement of the American Diabetes Association (ADA) and the European  
9 7 Association for the Study of Diabetes (EASD). *Diabetologia.* 2012;55(6):1577-96.  
10 8 24. Zinman B, Wanner C, Lachin JM, Fitchett D, Bluhmki E, Hantel S, et al.  
11 9 Empagliflozin, Cardiovascular Outcomes, and Mortality in Type 2 Diabetes. *The New*  
12 10 *England journal of medicine.* 2015;373(22):2117-28.  
13 11 25. Marso SP, Daniels GH, Brown-Frandsen K, Kristensen P, Mann JF, Nauck  
14 12 MA, et al. Liraglutide and Cardiovascular Outcomes in Type 2 Diabetes. *The New England*  
15 13 *journal of medicine.* 2016;375(4):311-22.  
16 14  
17 15  
18 16  
19 17  
20 18

## 18 **Figure legends**

19 Figure 1 - Flow chart of the treatment program. Visit A: Visit at the laboratory, eye clinic and  
20 21 consultation with nurse. Visit B: Consultation with nurse, dietician and physician. Visit C1  
22 23 and C2: Individual program with nurse. Group sessions: Module A: 'Me and my diabetes'.  
24 25 Module B: 'My feet and physical activity'. Module C: 'My diet'. Module D: 'My motivation  
26 27 and future lifestyle plans'. Visit C: Consultation with nurse and dietician. Visit D: Final visit  
28 29 with nurse, dietician and endocrinologist. After approximately 8 months patients with no  
30 31 complications are referred back to general practice and those with micro- or macrovascular  
32 33 complications are referred to the outpatient clinic.  
34 35  
36 37  
38 38  
39 39  
40 40  
41 41  
42 42  
43 43

44 28 Figure 2 - Proportion of patients achieving the treatment targets for HbA<sub>1c</sub>, LDL cholesterol,  
45 29 systolic and diastolic blood pressure at baseline and at follow-up.  
46 30  
47 31  
48 32

49 30  
50 31 Figure 3 - Proportion of patients on pharmacological treatment at baseline and follow-up. SU,  
51 32 sulfonylurea; DPP-4 i, Dipeptidyl peptidase 4 inhibitor; GLP-1, Glucagon-like peptide 1;  
52 33 OAD, oral antidiabetic drug; RAS, Renin angiotensin system; ASA, Acetylsalicylic acid  
53 34  
54 35  
55 36  
56 37  
57 38  
58 39  
59 40  
60 41

**Table 1 Baseline characteristics of the study cohort**

|                                         | N     | All             | Females ( <i>n</i> = 1,732) | Males ( <i>n</i> = 2,567) |
|-----------------------------------------|-------|-----------------|-----------------------------|---------------------------|
| Age (years)                             | 4,299 | 59.3 (12.4)     | 59.9 (12.9)                 | 58.9 (12.1)               |
| Weight (kg)                             | 4,256 | 91.5 (21.2)     | 84.4 (20.4)                 | 96.3 (20.4)               |
| Body mass index (kg/m <sup>2</sup> )    | 4,236 | 31.0 (6.6)      | 31.8 (7.4)                  | 30.3 (4.4)                |
| Smokers, N (%)                          | 4,071 | 1,629 (37.9)    | 622 (35.9)                  | 1,007 (39.5)              |
| Caucasians, N (%)                       | 4,289 | 3,724 (87)      | 1,457 (84)                  | 2,267 (89)                |
| Diabetes and complications              |       |                 |                             |                           |
| Duration of type 2 diabetes (years)     | 4,252 | 7.1 (6.5)       | 7.3 (6.6)                   | 6.9 (6.5)                 |
| GAD65 antibodies ≥25 U/mL, N (%)        | 2,376 | 116 (2.7)       | 59 (3.4)                    | 57 (2.2)                  |
| HbA <sub>1c</sub> (%)                   | 4,253 | 8.2 (3.9)       | 8.1 (3.9)                   | 8.2 (19)                  |
| HbA <sub>1c</sub> (mmol/mol)            | 4,253 | 66 (19)         | 65 (19)                     | 66 (19)                   |
| Fasting p-glucose (mmol/L)              | 2,850 | 9.9 (3.6)       | 9.6 (3.4)                   | 10.0 (3.7)                |
| Fasting c-peptide (pmol/L) Median (IQR) | 2,898 | 1050 (706-1500) | 1050 (699-1517)             | 1050 (711-1478)           |
| Prior cardiovascular disease, N (%)†    | 4,299 | 1,127 (26)      | 400 (23)                    | 727 (28)                  |
| Microalbuminuria, N (%)                 | 4,299 | 787 (18)        | 254 (15)                    | 533 (21)                  |
| Macroalbuminuria, N (%)                 | 4,299 | 211 (5)         | 47 (3)                      | 164 (6)                   |
| eGFR (mL/min)                           | 1,335 | 78 (17)         | 77 (18)                     | 79 (16)                   |
| Simple retinopathy, N (%)               | 3,859 | 1134 (29)       | 422 (27)                    | 712 (31)                  |
| Proliferative retinopathy, N (%)        | 3,859 | 56 (1)          | 25 (2)                      | 31 (1)                    |
| Peripheral neuropathy, N (%)            | 2,343 | 549 (23)        | 140 (15)                    | 409 (29)                  |
| Blood pressure                          |       |                 |                             |                           |
| Systolic blood pressure (mm Hg)         | 4,280 | 141.7 (21.7)    | 140.5 (22.5)                | 142.6 (21.1)              |
| Diastolic blood pressure (mm Hg)        | 4,280 | 82.5 (11.5)     | 80.8 (11.4)                 | 83.6 (11.5)               |

1  
2  
3  
4  
5  
6  
7  
8  
9  
10  
11  
12  
13  
14  
15  
16  
17  
18  
19  
20  
21  
22  
23  
24  
25  
26  
27  
28  
29  
30  
31  
32  
33  
34  
35  
36  
37  
38  
39  
40  
41  
42  
43  
44  
45  
46  
47

**Table 1 Baseline characteristics of the study cohort**

|                                     | N     | All           | Females (n = 1,732) | Males (n = 2,567) |
|-------------------------------------|-------|---------------|---------------------|-------------------|
| <b>Lipids</b>                       |       |               |                     |                   |
| Total cholesterol (mmol/L)          | 3,946 | 4.7 (1.2)     | 4.9 (1.3)           | 4.6 (1.2)         |
| LDL cholesterol (mmol/L)            | 3,946 | 2.5 (1.0)     | 2.6 (1.0)           | 2.5 (1.0)         |
| HDL cholesterol (mmol/L)            | 3,946 | 1.2 (0.4)     | 1.3 (0.4)           | 1.2 (0.4)         |
| Triglycerides (mmol/L) Median (IQR) | 3,946 | 1.7 (1.2–2.5) | 1.7 (1.2–2.5)       | 1.7 (1.2-2.6)     |
| <b>Medication</b>                   |       |               |                     |                   |
| Metformin, N (%)                    | 4,299 | 2511 (58)     | 1025 (59)           | 1486 (58)         |
| Sulfonylurea, N (%)                 | 4,299 | 1652 (38)     | 673 (39)            | 979 (38)          |
| DPP-4 inhibitor, N (%)              | 4,299 | 303 (7)       | 126 (7)             | 177 (7)           |
| GLP-1 analog, N (%)                 | 4,299 | 168 (4)       | 73 (4)              | 95 (4)            |
| Insulin, N (%)                      | 4,299 | 836 (19)      | 346 (20)            | 490 (19)          |
| Other OAD, N (%)                    | 4,299 | 179 (4)       | 67 (4)              | 112 (4)           |
| RAS blockade, N (%)                 | 4,299 | 2027 (47)     | 736 (17)            | 1291(30)          |
| All antihypertensive drugs, N (%)   | 4,299 | 2678 (62)     | 1099 (26)           | 1579 (37)         |
| Lipid lowering drug, N (%)          | 4,299 | 1988 (46)     | 776 (45)            | 1212 (47)         |
| Acetylsalicylic acid, N (%)         | 4,299 | 1538 (36)     | 530 (31)            | 1008 (39)         |

Values are means (SDs) unless stated otherwise.  
†Prior CVD was defined as one or more of the following: myocardial infarction, heart surgery, ischaemic heart disease, heart insufficiency, vascular surgery, stroke, transitory cerebral ischaemia, amputation.  
CVD, cardiovascular disease; GAD, glutamic acid decarboxylase; HbA<sub>1c</sub>, haemoglobin A<sub>1c</sub>; HDL, high-density lipoprotein; LDL, low-density lipoprotein; DPP-4, Dipeptidyl peptidase 4; GLP-1, Glucagon-like peptide 1; OAD, oral antidiabetic drug; RAS, Renin angiotensin system.

**Table 2 Estimated CVD or CHD risk**

|                                                | Baseline                      | Follow-up                       |
|------------------------------------------------|-------------------------------|---------------------------------|
| Estimated CVD 5-year risk: NDR Risk engine:    |                               |                                 |
| All                                            | 29.8 (19.6-44.6) <sup>a</sup> | 25.0 (16.6-37.4) <sup>b,*</sup> |
| F                                              | 24.9 (15.9-37.0)              | 21.1 (13.7-31.1)*               |
| M                                              | 34.0 (22.6-48.2)              | 28.1 (19.1-41.2)*               |
| Estimated CHD 5-year risk: UKPDS Risk Engine:  |                               |                                 |
| All                                            | 7.4 (3.9-13.7) <sup>c</sup>   | 5.0 (2.7-9.2) <sup>d,*</sup>    |
| F                                              | 4.8 (2.6-8.7)                 | 3.3 (1.9-5.9)*                  |
| M                                              | 9.6 (5.3-16.7)                | 6.4 (3.7-11.3)*                 |
| Estimated CHD 10-year risk: UKPDS Risk Engine: |                               |                                 |
| All                                            | 17.1 (9.3-30.4) <sup>c</sup>  | 11.8 (6.5-21.1) <sup>d,*</sup>  |
| F                                              | 11.4 (6.1-20.0)               | 7.9 (4.5-14.0)*                 |
| M                                              | 22.1 (12.6-36.2)              | 15.0 (9.0-25.4)*                |

Estimated CVD risk according to the Swedish National Register (NDR) risk engine and the estimated CHD risk according to the UKPDS risk engine. Data is median risk in % (IQR).

a  $n = 3,865$ ; b  $n = 3,730$ ; c  $n = 3,895$ ; d  $n = 3,757$ , \*  $P < 0.0001$ .



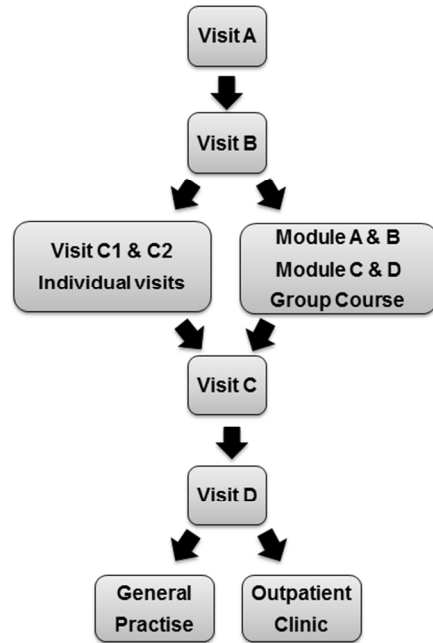

Figure 1 Flow chart of the treatment program. Visit A: Visit at the laboratory, eye clinic and consultation with nurse. Visit B: Consultation with nurse, dietician and physician. Visit C1 and C2: Individual program with nurse. Group sessions: Module A: 'Me and my diabetes'. Module B: 'My feet and physical activity'. Module C: 'My diet'. Module D: 'My motivation and future lifestyle plans'. Visit C: Consultation with nurse and dietician. Visit D: Final visit with nurse, dietician and endocrinologist. After approximately 8 months patients with no complications are referred back to general practice and those with micro- or macrovascular complications are referred to the outpatient clinic.

254x190mm (96 x 96 DPI)

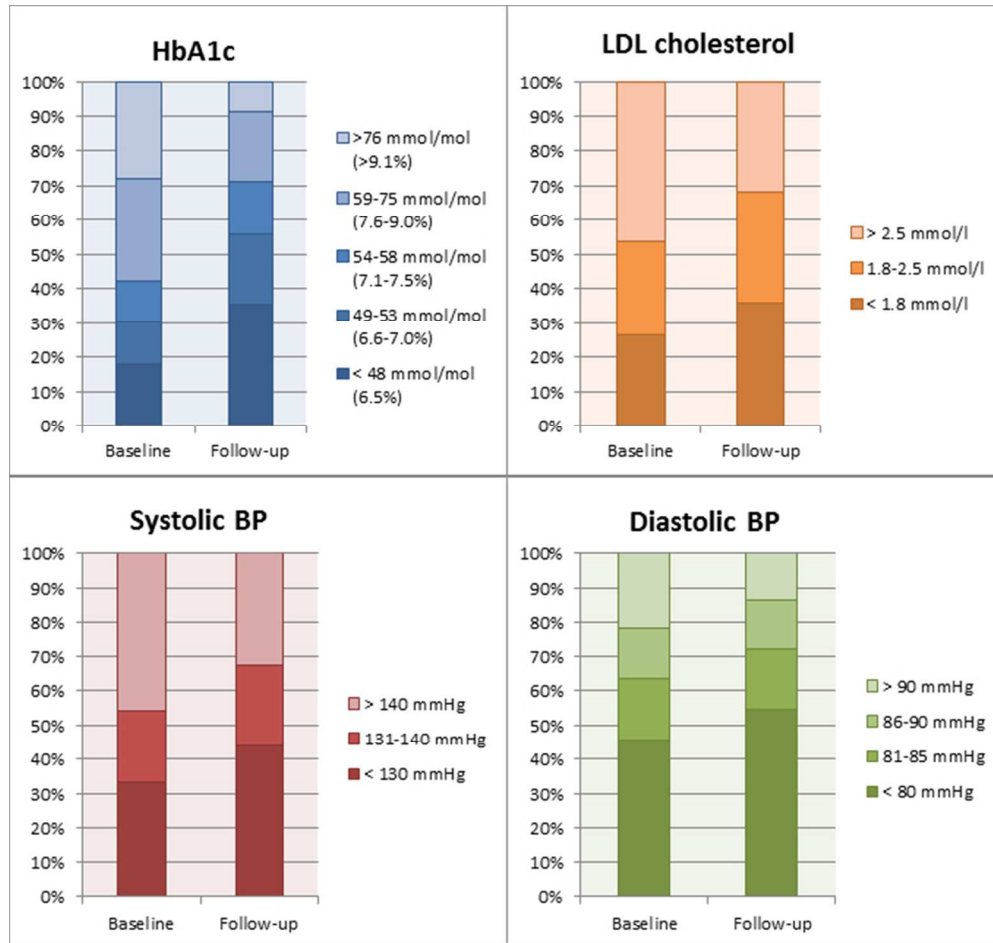

Figure 2 Proportion of patients achieving the treatment targets for HbA1c, LDL cholesterol, systolic and diastolic blood pressure at baseline and at follow-up.

180x171mm (96 x 96 DPI)

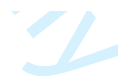

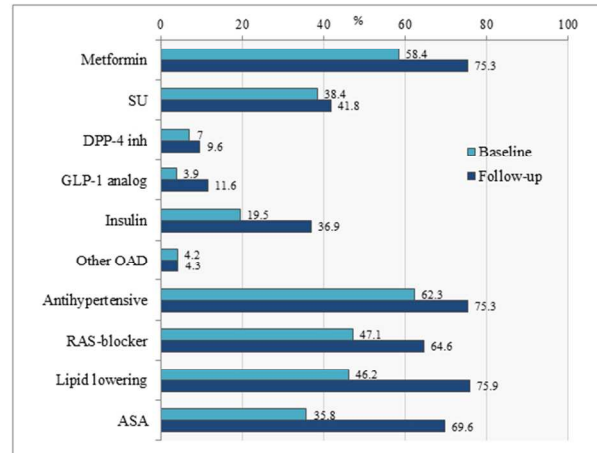

Figure 3 - Proportion of patients on pharmacological treatment at baseline and follow-up. SU, sulfonylurea; DPP-4 inh, Dipeptidyl peptidase 4 inhibitor; GLP-1, Glucagon-like peptide 1; OAD, oral antidiabetic drug; RAS, Renin angiotensin system; ASA, Acetylsalicylic acid

254x190mm (96 x 96 DPI)

**STROBE 2007 (v4) Statement—Checklist of items that should be included in reports of *cohort studies***

| Section/Topic                | Item # | Recommendation                                                                                                                                                                       | Reported on page # |
|------------------------------|--------|--------------------------------------------------------------------------------------------------------------------------------------------------------------------------------------|--------------------|
| Title and abstract           | 1      | (a) Indicate the study's design with a commonly used term in the title or the abstract                                                                                               | 1                  |
|                              |        | (b) Provide in the abstract an informative and balanced summary of what was done and what was found                                                                                  | 2                  |
| <b>Introduction</b>          |        |                                                                                                                                                                                      |                    |
| Background/rationale         | 2      | Explain the scientific background and rationale for the investigation being reported                                                                                                 | 4                  |
| Objectives                   | 3      | State specific objectives, including any prespecified hypotheses                                                                                                                     | 4-5                |
| <b>Methods</b>               |        |                                                                                                                                                                                      |                    |
| Study design                 | 4      | Present key elements of study design early in the paper                                                                                                                              | 5-6                |
| Setting                      | 5      | Describe the setting, locations, and relevant dates, including periods of recruitment, exposure, follow-up, and data collection                                                      | 5-6                |
| Participants                 | 6      | (a) Give the eligibility criteria, and the sources and methods of selection of participants. Describe methods of follow-up                                                           | 6                  |
|                              |        | (b) For matched studies, give matching criteria and number of exposed and unexposed                                                                                                  |                    |
| Variables                    | 7      | Clearly define all outcomes, exposures, predictors, potential confounders, and effect modifiers. Give diagnostic criteria, if applicable                                             | 6-7                |
| Data sources/<br>measurement | 8*     | For each variable of interest, give sources of data and details of methods of assessment (measurement). Describe comparability of assessment methods if there is more than one group | 6-7                |
| Bias                         | 9      | Describe any efforts to address potential sources of bias                                                                                                                            |                    |
| Study size                   | 10     | Explain how the study size was arrived at                                                                                                                                            |                    |
| Quantitative variables       | 11     | Explain how quantitative variables were handled in the analyses. If applicable, describe which groupings were chosen and why                                                         | 6-7                |
| Statistical methods          | 12     | (a) Describe all statistical methods, including those used to control for confounding                                                                                                | 8                  |
|                              |        | (b) Describe any methods used to examine subgroups and interactions                                                                                                                  | 8                  |
|                              |        | (c) Explain how missing data were addressed                                                                                                                                          | 8                  |
|                              |        | (d) If applicable, explain how loss to follow-up was addressed                                                                                                                       |                    |
|                              |        | (e) Describe any sensitivity analyses                                                                                                                                                |                    |
| <b>Results</b>               |        |                                                                                                                                                                                      |                    |

|                          |     |                                                                                                                                                                                                              |              |
|--------------------------|-----|--------------------------------------------------------------------------------------------------------------------------------------------------------------------------------------------------------------|--------------|
| Participants             | 13* | (a) Report numbers of individuals at each stage of study—eg numbers potentially eligible, examined for eligibility, confirmed eligible, included in the study, completing follow-up, and analysed            | 6            |
|                          |     | (b) Give reasons for non-participation at each stage                                                                                                                                                         | 6            |
|                          |     | (c) Consider use of a flow diagram                                                                                                                                                                           |              |
| Descriptive data         | 14* | (a) Give characteristics of study participants (eg demographic, clinical, social) and information on exposures and potential confounders                                                                     | 9            |
|                          |     | (b) Indicate number of participants with missing data for each variable of interest                                                                                                                          | 21 (Table 1) |
|                          |     | (c) Summarise follow-up time (eg, average and total amount)                                                                                                                                                  | 9            |
| Outcome data             | 15* | Report numbers of outcome events or summary measures over time                                                                                                                                               | 9-10         |
| Main results             | 16  | (a) Give unadjusted estimates and, if applicable, confounder-adjusted estimates and their precision (eg, 95% confidence interval). Make clear which confounders were adjusted for and why they were included | 9-10         |
|                          |     | (b) Report category boundaries when continuous variables were categorized                                                                                                                                    | 9-10         |
|                          |     | (c) If relevant, consider translating estimates of relative risk into absolute risk for a meaningful time period                                                                                             |              |
| Other analyses           | 17  | Report other analyses done—eg analyses of subgroups and interactions, and sensitivity analyses                                                                                                               |              |
| <b>Discussion</b>        |     |                                                                                                                                                                                                              |              |
| Key results              | 18  | Summarise key results with reference to study objectives                                                                                                                                                     | 11           |
| <b>Limitations</b>       |     |                                                                                                                                                                                                              |              |
| Interpretation           | 20  | Give a cautious overall interpretation of results considering objectives, limitations, multiplicity of analyses, results from similar studies, and other relevant evidence                                   | 12-14        |
| Generalisability         | 21  | Discuss the generalisability (external validity) of the study results                                                                                                                                        | 14-15        |
| <b>Other information</b> |     |                                                                                                                                                                                                              |              |
| Funding                  | 22  | Give the source of funding and the role of the funders for the present study and, if applicable, for the original study on which the present article is based                                                | 17           |

\*Give information separately for cases and controls in case-control studies and, if applicable, for exposed and unexposed groups in cohort and cross-sectional studies.

**Note:** An Explanation and Elaboration article discusses each checklist item and gives methodological background and published examples of transparent reporting. The STROBE checklist is best used in conjunction with this article (freely available on the Web sites of PLoS Medicine at <http://www.plosmedicine.org/>, Annals of Internal Medicine at <http://www.annals.org/>, and Epidemiology at <http://www.epidem.com/>). Information on the STROBE Initiative is available at [www.strobe-statement.org](http://www.strobe-statement.org).

# BMJ Open

## Impact of a multifactorial treatment program on clinical outcomes and cardiovascular risk estimates: a retrospective cohort study from a specialized diabetes centre in Denmark

|                                 |                                                                                                                                                                                                                                                                                                                                                                                                                                 |
|---------------------------------|---------------------------------------------------------------------------------------------------------------------------------------------------------------------------------------------------------------------------------------------------------------------------------------------------------------------------------------------------------------------------------------------------------------------------------|
| Journal:                        | <i>BMJ Open</i>                                                                                                                                                                                                                                                                                                                                                                                                                 |
| Manuscript ID                   | bmjopen-2017-019214.R1                                                                                                                                                                                                                                                                                                                                                                                                          |
| Article Type:                   | Research                                                                                                                                                                                                                                                                                                                                                                                                                        |
| Date Submitted by the Author:   | 18-Dec-2017                                                                                                                                                                                                                                                                                                                                                                                                                     |
| Complete List of Authors:       | Safai, Narges; Steno Diabetes Center Copenhagen, Patient Care<br>Carstensen, Bendix; Steno Diabetes Center Copenhagen, Department of Clinical Epidemiology<br>Vestergaard, Henrik; The Novo Nordisk Foundation, Center for Basic Metabolic Research, Section of Metabolic Genetics; Steno Diabetes Center Copenhagen, Patient Care<br>Ridderstråle, Martin; Novo Nordisk AS; Lunds Universitet, Department of Clinical Sciences |
| <b>Primary Subject Heading</b>: | Diabetes and endocrinology                                                                                                                                                                                                                                                                                                                                                                                                      |
| Secondary Subject Heading:      | Epidemiology, Diabetes and endocrinology, Medical management                                                                                                                                                                                                                                                                                                                                                                    |
| Keywords:                       | Type 2 diabetes, Glycemic control, Outcomes, CVD risk, Multifactorial treatment                                                                                                                                                                                                                                                                                                                                                 |
|                                 |                                                                                                                                                                                                                                                                                                                                                                                                                                 |

SCHOLARONE™  
Manuscripts

only

1  
2  
3  
4 **Title page**

5  
6  
7 **Impact of a multifactorial treatment program on clinical outcomes and cardiovascular**  
8 **risk estimates: a retrospective cohort study from a specialized diabetes centre in**  
9 **Denmark**  
10  
11  
12

13  
14  
15  
16 Narges Safai<sup>a</sup>, Bendix Carstensen<sup>b</sup>, Henrik Vestergaard<sup>c</sup> and Martin Ridderstråle<sup>d</sup>

17  
18 <sup>a</sup> Steno Diabetes Center Copenhagen, Gentofte, Denmark; narges.safai@regionh.dk

19  
20 <sup>b</sup> Steno Diabetes Center Copenhagen, Gentofte, Denmark; bendix.carstensen@regionh.dk

21  
22 <sup>c</sup> Novo Nordisk Foundation of Basic Metabolic Research, University of Copenhagen,  
23  
24 Denmark; Henrik.vestergaard@sund.ku.dk

25  
26 <sup>d</sup> Novo Nordisk A/S, Søborg, Denmark and Department of Clinical Sciences, Lund  
27  
28 University, Malmö, Sweden; mtrd@novonordisk.com  
29

30  
31  
32  
33 Corresponding author:

34  
35 Narges Safai, MD

36  
37 Steno Diabetes Center Copenhagen

38  
39 Niels Steensens Vej 2-4

40  
41 DK-2820 Gentofte

42  
43 Denmark

44  
45 +45 3091 3395 (direct)

46  
47  
48 [narges.safai@regionh.dk](mailto:narges.safai@regionh.dk)

49  
50 Number of tables: 2

51  
52 Number of figures: 3

53  
54  
55  
56  
57  
58  
59  
60

1  
2  
3 **1 Abstract**

4 **2 Objectives:** To investigate the impact of a multifactorial treatment program in a real-life

5  
6 3 setting on clinical outcomes and estimated cardiovascular disease (CVD) risk.

7  
8 4 **Design:** A retrospective observational cohort study, using data from the electronic medical

9  
10 5 records and national registers.

11  
12 6 **Setting:** Tertiary diabetes centre in Denmark.

13  
14 7 **Participants:** Patients with type 2 diabetes ( $n=4,299$ ) referred to a program with focus on

15  
16 8 treatment of hyperglycaemia, hypertension and dyslipidaemia, between Jan 1<sup>st</sup> 2001 and

17  
18 9 April 1<sup>st</sup> 2016.

19  
20  
21 10 **Outcomes:** Primary outcomes were changes in HbA<sub>1c</sub>, blood pressure and LDL cholesterol

22  
23 11 as well as proportion reaching treatment targets, together with changes in antidiabetic,

24  
25 12 antihypertensive and lipid lowering treatment. Our secondary outcome was to investigate the

26  
27 13 impact on estimated CVD risk. Linear mixed model for repeated measurements were used for

28  
29 14 continuous variables and logistic regression for dichotomous variables.

30  
31 15 **Results:** The patients achieved a mean  $\pm$  SD decrease in HbA<sub>1c</sub>, systolic and diastolic blood

32  
33 16 pressure (BP), and LDL cholesterol of  $1.0\pm 0.04\%$  ( $10.6\pm 0.4$  mmol/mol),  $6.3\pm 0.4$  mmHg,

34  
35 17  $2.7\pm 0.2$  mmHg and  $0.32\pm 0.02$  mmol/l, respectively ( $p<0.0001$ ). The proportion of patients

36  
37 18 who met the treatment goal for HbA<sub>1c</sub> ( $<7\%$  [ $<53$ mmol/mol]) increased from 31% to 58% ( $p$

38  
39 19  $<0.0001$ ); for BP ( $<130/80$  mm Hg) from 24% to 34% ( $p <0.0001$ ), and for LDL cholesterol

40  
41 20 ( $<2.5$  mmol/l (patients without previous CVD) or  $<1.8$  mmol/l (patients with previous CVD))

42  
43 21 from 52% to 65%. Those reaching all three guideline treatment targets increased from 4% to

44  
45 22 15% ( $p<0.0001$ ), and when relaxing the BP target to  $<140/85$  from 8% to 24%. The estimated

46  
47 23 CVD risk was relatively reduced by 15.2% using the Swedish National Diabetes Register

48  
49 24 Risk Engine and 30.9% using the UKPDS risk engine.



1  
2  
3 1 **Conclusions:** Our data supports that short term multifactorial treatment of patients with  
4  
5 2 glycaemic dysregulation in a specialist outpatient setting is both achievable and effective, and  
6  
7 3 associated with a clinically meaningful improvement in CVD risk.  
8  
9 4  
10  
11 5  
12

13 6 **Strengths and limitations of this study**

- 15  
16 7 • Large cohort of dysregulated patients with type 2 diabetes under real-world conditions  
17  
18 8 and strong validity of data with repeated recordings of clinical measurements and  
19  
20 9 access to national registries.  
21  
22 10 • Selection bias in terms of more motivated and high risk patients being referred to the  
23  
24 11 clinic, and by exclusion of those who did not show up.  
25  
26 12 • The use of risk engines can only give an estimate of the CVD risk and the UKPDS  
27  
28 13 risk engine is based on a population many years prior to ours where treatment  
29  
30 14 guidelines were different.  
31  
32

33 15  
34  
35 16 **Keywords:** Type 2 diabetes, glycaemic control, outcomes, CVD risk and multifactorial  
36  
37 17 treatment  
38  
39  
40 18  
41  
42 19  
43  
44 20  
45  
46 21  
47  
48  
49  
50  
51  
52  
53  
54  
55  
56  
57  
58  
59  
60

## 1 **Introduction**

2 Type 2 diabetes is an increasing global health threat. It is estimated that 439 million people  
3 will be diagnosed with diabetes by 2030 (1). Type 2 diabetes is associated with an increased  
4 risk of microvascular complications such as nephropathy, neuropathy, and retinopathy as well  
5 as macrovascular disease, resulting in a decreased life expectancy and substantial personal  
6 and societal expenses (2). Ensuring good glycaemic control remains the most effective  
7 therapeutic measure to reduce the risk of developing microvascular disease (3, 4).

8 Multifactorial treatment with tight control of glycaemia, blood pressure (BP) and lipids,  
9 accompanied by acetylsalicylic acid and lifestyle advice, is known to reduce progression of  
10 microvascular complications, cardiovascular disease (CVD), and mortality by 50% in patients  
11 with type 2 diabetes and microalbuminuria (5-7). Consequently, diabetes guidelines have  
12 advocated an intensified treatment approach aiming at addressing and reducing all CVD risk  
13 factors in patients with diabetes since several years (8, 9).

14  
15 For most patients, sufficient glycaemic, BP and lipid control can be achieved in a primary  
16 care setting but in high risk patients, or in patients with complex treatment regimens, the  
17 proportion of patients who achieve metabolic control in primary care is lower (10, 11). In this  
18 situation, in most health care systems, high risk patients are referred to specialist clinics for  
19 evaluation. A broad risk factor intervention in this subgroup has proven particularly effective  
20 in the Steno-2 study (5). However, it remains unknown whether the results seen in the study  
21 setting can be achieved in clinical practice.

22  
23 The overall aim of this study was to describe how the multifactorial intervention methods  
24 from the Steno-2 study perform in a larger scale clinical setting. Our primary objective was to  
25 describe changes in metabolic outcomes and pharmacological treatment as a result of such

1 structured short term intervention and to test for gender differences. Our secondary objective  
2 was to evaluate the impact on estimated CVD risk by using two different risk assessment  
3 tools: the UKPDS Risk Engine (12), and the 5-year Swedish National Diabetes Registry  
4 (NDR) risk model (13).

## 6 **Methods**

### 7 Design and setting

8 This study is based on patients referred to Steno Diabetes Center (SDC), a tertiary  
9 multidisciplinary and highly specialized diabetes centre in the Capital Region of Denmark. It  
10 serves as one out of three referral centres with a catchment area of over 1.7 million people  
11 and provides diabetes care on a permanent basis to about 5.600 patients. During the Steno-2  
12 study, SDC designed a treatment program algorithm specifically for patients with type 2  
13 diabetes and glycaemic dysregulation. The primary goal of the program is to improve patient  
14 quality of life and reduce mortality by prevention of acute and chronic complications of  
15 diabetes. This is done by motivating and encouraging self-management, professional support  
16 in behavioural changes, and pharmacological treatment according to national and  
17 international guidelines. The SDC Type 2 Clinic (T2C) opened in 2001, providing care for  
18 patients referred from general practitioners (GPs) or other hospitals in the region. Patients  
19 were referred to the clinic either as newly diagnosed with a need for education and start of  
20 treatment, requiring a shift to insulin treatment, having micro- or macrovascular  
21 complications, or having glycaemic dysregulation in spite of attempts to control the disease  
22 by the GP. The program, which is still running and is the same for all patients, involves a  
23 consultation with a nurse, a dietician, and a physician in a structured order with specific  
24 assignments and is comparable to the intensive treatment arm of the Steno-2 study (Figure 1).  
25 The individual visits are, depending on the need, complemented by optional group-based

1 theme sessions with the overall aim of facilitating patient empowerment and with phone  
2 consultations from a nurse. The treatment program consist of self-management training with  
3 a focus on knowledge, lifestyle behaviour including diet, physical activity and smoking  
4 cessation, skills to improve glycaemic control such as self-monitoring of blood glucose and  
5 skills to prevent and identify complications. Furthermore, there is focus on pharmacological  
6 treatment of hyperglycaemia, hypertension and dyslipidaemia. After approximately eight  
7 months, patients were evaluated for referral back to their GP, or to continue at the SDC  
8 outpatient clinic. The structure of program has remained unchanged in the study period while  
9 e.g. medications used have followed updated treatment guidelines. The Danish treatment  
10 guidelines have followed the international guidelines from EASD and ADA and were revised  
11 in 2003, 2011 and 2014 (14-16). We defined the baseline and evaluation follow-up visits as  
12 the first and last visit to the T2C, respectively. This study is a retrospective observational  
13 study with demographics, clinical, and laboratory information extracted from the electronic  
14 medical records and laboratory database of SDC.

## 15 16 Study population

17 We included all patients who had finalized a treatment program between 1<sup>st</sup> of January 2001  
18 and 1<sup>st</sup> of April 2016 ( $n = 4,489$ ), and to avoid no-shows, once off or very brief consultations  
19 we excluded patients with a treatment duration under 30 days (i.e. between the baseline and  
20 follow-up visits,  $n = 190$ ). We ended up with a total of  $n = 4,299$  patients. 16% of the patients  
21 were subsequently re-referred to the clinic, but we only included their first treatment program  
22 here.

## 23 24 Subject characteristics

1  
2  
3 1 Laboratory analyses at the baseline visit were encouraged to be fasting and included: glucose,  
4  
5 2 HbA<sub>1c</sub>, haemoglobin, creatinine, total-cholesterol, high-density lipoprotein-cholesterol (HDL)  
6  
7 3 cholesterol, low-density lipoprotein (LDL) cholesterol, triglycerides (TG), C-peptide and  
8  
9 4 urine albumin. At all in-between visits and at follow-up an HbA<sub>1c</sub>, BP and weight were  
10  
11 5 measured. All laboratory and anthropometric measurements were recorded using  
12  
13 6 standardized procedures at the SDC accredited laboratory (ISO 15189). Body mass index  
14  
15 7 (BMI) was calculated from weight and height (kg/m<sup>2</sup>). A person was considered overweight  
16  
17 8 at BMI  $\geq$  25 kg/m<sup>2</sup>, and obese at BMI  $\geq$  30 kg/m<sup>2</sup>. For BP and heart rate automated  
18  
19 9 oscillometric blood pressure recorders were used (AND UA-787plus, A&D medical,  
20  
21 10 California, USA). Smoking status was obtained at every visit.  
22  
23  
24  
25

## 26 12 Diabetes complications and pharmacological treatment

27  
28 13 Micro albuminuria was here defined as a morning urine sample with urine albumin of 30-300  
29  
30 14 mg/L or urine albumin to creatinine ratio  $>$  30 mg/g to 300 mg/g at the first visit. Macro  
31  
32 15 albuminuria likewise but with a value  $>$  300 mg/L or  $>$  300 mg/g. Peripheral neuropathy was  
33  
34 16 defined by examining vibration sensation with a biothesiometer and using an age-adjusted  
35  
36 17 threshold (17). Information on cardiovascular disease was obtained from The National Patient  
37  
38 18 Register and included diagnosis from 1977 till 2015 and procedures from 1995 till 2015.  
39  
40

41 19 Prior CVD was defined as one or more of the following: myocardial infarction, heart surgery,  
42  
43 20 ischaemic heart disease, heart insufficiency, atrial fibrillation, vascular surgery, stroke,  
44  
45 21 transitory cerebral ischaemia and amputations using ICD-8 and ICD-10 codes.  
46  
47

48 22 Information on medication was obtained by Register of Medicinal Products Statistics, where  
49  
50 23 individual-level data on all prescription drugs sold in Danish community pharmacies since  
51  
52 24 1994 has been recorded and administered by Statistics Denmark (18). A person was defined  
53  
54 25 as being on a treatment at baseline if they had purchased a prescribed drug less than 180 days  
55  
56  
57  
58  
59  
60

1 before their first visit and at follow-up if they purchased a prescribed drug after their first  
2 visit and less than 30 days after their last visit.

3 Permission to use data from the patient register was obtained from the Danish Data Protection  
4 Agency (ref. number: 2007-58-0015) and from the Danish Patient Safety Authority.

## 5 6 CVD risk

7 To evaluate the effect of changes in metabolic outcomes on the estimated risk of CVD, we  
8 calculated CVD risk at baseline and at follow-up using two different risk assessment tools: a  
9 Swedish risk model specific for type 2 diabetes (13) and the UKPDS Risk Engine (12). The  
10 Swedish model is based on patients with type 2 diabetes using 12 predictors: sex, age,  
11 diabetes duration, TG, HDL cholesterol, HbA<sub>1c</sub>, systolic BP, BMI, smoking status,  
12 albuminuria, atrial fibrillation and previous CVD. It is derived from a large observational  
13 sample of patients ( $n = 24,288$ ) in the Swedish National Diabetes Register (NDR) followed  
14 from 2002 to 2007 and estimates the 5-year risk of CVD. The UKPDS Risk Engine is also  
15 type 2 diabetes-specific and based on 4,540 patients from the UKPDS trial (1977 to 1991). It  
16 includes HbA<sub>1c</sub> as a continuous variable and calculates the risk of developing a new coronary  
17 heart disease (CHD) event.

## 18 19 Statistical methods

20 The primary outcomes were changes in blood glucose control (HbA<sub>1c</sub>), BP and lipids from  
21 first visit (baseline) to end of treatment (follow-up evaluation visit) and to explore gender  
22 differences in outcomes. Furthermore we investigated how many patients reached the  
23 recommended targets for HbA<sub>1c</sub> (A), BP (B) and LDL cholesterol (C) according to national  
24 guidelines (14), collectively referred to as ABC control: HbA<sub>1c</sub> < 7% (< 53 mmol/mol), BP <  
25 130/80 mm Hg and LDL cholesterol < 2.5 mmol/l (< 100 mg/dl, patients without previous

1  
2  
3 1 CVD) or  $< 1.8$  mmol/l ( $< 70$  mg/dl, patients with previous CVD). For blood lipids, the T2C  
4  
5 2 program assumed they would not deteriorate if they were on target at baseline and  
6  
7 3 measurements were only repeated in case they were not at target at baseline. Accordingly, for  
8  
9 4 this analysis a last observation carried forward approach was used to impute missing data. *T*  
10  
11 5 test was used for gender differences at baseline and at follow-up. Comparison between  
12  
13 6 baseline and follow-up was made using mixed model for repeated measurements (MMRM)  
14  
15 7 for continuous variables with the subject as a random effect and logistic regression for  
16  
17 8 dichotomous variables e.g. pharmacological treatment. McNemar test was used to compare  
18  
19 9 changes in categorical variables. For risk estimates, exact 95%-confidence intervals (CI) were  
20  
21 10 calculated. SAS Enterprise Guide 7.1 (SAS Institute, Cary, NC) was used for database  
22  
23 11 management and all of the above-mentioned analyses.  
24  
25  
26  
27  
28

## 29 13 **Results**

### 30 31 14 32 33 15 Study cohort characteristics

34  
35 16 Baseline characteristics of the study cohort are shown in Table 1. The majority of patients  
36  
37 17 were Caucasians, and 19% were diagnosed with diabetes within a year before their referral.  
38  
39 18 There were more males ( $n = 2,567$ ) than females ( $n = 1,732$ ) but no difference in treatment  
40  
41 19 duration: median treatment program duration was 8.4 months (IQR: 6.1, 11.3). There were  
42  
43 20 more male smokers and ex-smokers. Males had a higher level of HbA<sub>1c</sub>, BP, weight and TG  
44  
45 21 but lower BMI and cholesterol levels at baseline (Table 1).  
46  
47  
48  
49

### 50 23 Metabolic outcomes

51  
52 24 There was a significant decrease in HbA<sub>1c</sub> between baseline and follow-up of  $1.0 \pm 0.04\%$   
53  
54 25 ( $10.6 \pm 0.4$  mmol/mol), with no gender difference. The decrease in systolic BP was  $6.3 \pm 0.4$   
55  
56  
57  
58  
59

1 mm Hg and in diastolic BP  $2.7 \pm 0.2$  mm Hg ( $p < 0.0001$  for both). The effect of treatment on BP was the same in both genders. There was a significant decrease in total-cholesterol, LDL and TG of  $0.39 \pm 0.03$  mmol/l,  $0.32 \pm 0.02$  mmol/l and  $0.22 \pm 0.05$  mmol/l, respectively. There was no change in HDL levels overall ( $p = 0.2$ ). As expected, females had higher HDL levels than males, both at baseline and at follow-up ( $p < 0.0001$ ). This gender difference was also seen for total- and LDL cholesterol levels where females had higher levels at both baseline and follow-up. The effect of treatment on lipid levels was equal in both genders.

#### 9 ABC control

10 In general, the proportion of patients achieving full ABC control according to national guideline treatment targets increased from 4% to 15% ( $p < 0.0001$ ). More females were achieving all three treatment targets at both baseline ( $p = 0.047$ ) and at follow-up ( $p = 0.014$ ). Patients achieving the HbA<sub>1c</sub> target increased from 31% to 58% ( $p < 0.0001$ ), the BP target from 24% to 34% ( $p < 0.0001$ ), and the LDL target from 52% to 65% ( $p = 0.002$ , Figure 2). If the BP target was relaxed from  $< 130/80$  mm Hg to  $< 140/85$  mm Hg the percentage achieving the BP target increased from 43% at baseline to 58% at follow-up ( $p < 0.0001$ ), and consequently full ABC control from 8% at baseline to 24% at follow-up ( $p < 0.0001$ ).

#### 19 Changes in pharmacological treatment

20 The most common antidiabetic drug at baseline was metformin, which 58.4% of the patients were on, followed by sulphonyl urea (SU), 38.4%, and insulin, 19.5% (Figure 3). Only a small proportion of patients were on dipeptidyl peptidase 4 (DPP-4) inhibitors, 7.0%, glucagon-like peptide 1 (GLP-1) analogues, 3.9%, or other antidiabetic drug, 4.2%. In general there was an increase in the use of medication during the program. The largest increase was seen in use of metformin to 75.3%, insulin to 36.9% and GLP1-analogues to



1 11.6%. While SU only increased slightly to 41.8%, DPP-4 inhibitors to 9.6% and other  
2 antidiabetics 4.3%.

3 As part of the multifactorial treatment program, we also observed an increase in use of  
4 antihypertensive drugs to 75.3%, lipid lowering drugs to 75.9% and acetylsalicylic acid  
5 (ASA) to 69.6%.

### 6 7 Changes in cardiovascular risk

8 Estimated baseline and follow-up cardiovascular risk according to the used risk engines are  
9 shown in Table 2. Using the Swedish NDR model which predicts the 5 year risk of a new  
10 CVD event in a diabetic population, we observed a relative risk reduction of 15.2% (95% CI:  
11 14.5-15.9). The UKPDS risk engine showed a relative risk reduction of 30.9% (95% CI:  
12 30.3-31.5) in the 5 year CHD risk estimate. Females had a lower risk than males both at  
13 baseline and at follow-up according to both risk models ( $p < 0.0001$ ). Meanwhile, both  
14 according to the Swedish NDR model and the UKPDS risk engine, females had a smaller  
15 relative risk reduction compared to males ( $p < 0.0001$ ).

### 16 17 **Discussion**

18  
19 This study shows that a short term targeted multifactorial treatment program in a specialized  
20 clinical setting can improve metabolic outcome measures and CVD risk in patients with type  
21 2 diabetes and high prevalence of complications. This confirms that multifactorial treatment  
22 not only works in a clinical study setting, but is also feasible and effective in real world  
23 clinical practice. With a specialized group of health care providers and a structured treatment  
24 and educational program that focuses on lifestyle intervention, self-management training and

1 pharmacological treatment of hyperglycaemia, hypertension and dyslipidaemia, it is possible  
2 to accomplish significant CVD risk reductions in a high risk population with diabetes.

#### 3 4 ABC control

5 Intensive multifactorial intervention in high risk patients has previously been shown to reduce  
6 CVD and mortality (7), and a recent 21 years follow-up of the Steno-2 study population  
7 shows that patients in the intensive-therapy group survived for a median of 7.9 years longer  
8 than the conventional-therapy group patients (19). Here we show that the same treatment  
9 program also works in clinical practice in a more diverse population, and results in a  
10 substantial reduction of 5- and 10-year CVD risk as estimated by two of the available and  
11 commonly used risk engines. In terms of risk factor intervention, glucose control continuous  
12 to be the greatest challenge to diabetes care. Nonetheless, all but 21% of patients changed  
13 from a higher to a lower HbA<sub>1c</sub> category in this follow-up. Importantly, the improvement in  
14 glycaemic control was not accompanied by a general increase in weight. In fact, although we  
15 found that 15% of those in the normal weight category shifted to the overweight category  
16 when comparing the changes in BMI categories, 15% of those who were in the obese or  
17 overweight category dropped to a lower weight category. The weight gain observed in some  
18 patients is probably explained by the increased use of insulin, while weight loss in others can  
19 be explained by an increased use of GLP-1 receptor agonist treatment in recent years along  
20 with lifestyle management including dietary and physical activity advice.

21  
22 With focus on hyperglycaemia, hypertension and dyslipidaemia, we found an increase in the  
23 proportion of patients achieving the recommended targets that are comparable to intervention  
24 studies (20, 21). Here, the relative proportion of patients achieving HbA<sub>1c</sub> < 53 mmol/mol  
25 (7%) nearly doubled, BP < 130/80 mm Hg increased by 42% and LDL < 2.5 mmol/l by 25%.

1  
2  
3 1 The T2C treatment program in this complex high-risk cohort resulted in a higher prevalence  
4  
5 2 of risk factors in control equal to what has been observed in the more general diabetes  
6  
7 3 population in the National Health and Nutrition Examination Surveys (NHANES) from 2007  
8  
9 4 to 2010 (22). The NHANES data differ in the way that their data was cross-sectional with  
10  
11 5 participants with self-reported diabetes, without any distinction between type 1 and type 2,  
12  
13 6 and with a different risk profile. Our population was more selected by being referred from  
14  
15 7 their GP and requiring specialized care, which means they either had more comorbidities or a  
16  
17 8 more complex treatment than the general patient with type 2 diabetes. For HbA<sub>1c</sub> 58% in our  
18  
19 9 cohort achieved the treatment target vs 53% in the NHANES cohort and for LDL-cholesterol  
20  
21 10 65% vs 56%, respectively. But for BP there was a big difference, 34% in our cohort vs. 51%  
22  
23 11 in the NHANES cohort. This could be due to a higher prevalence of high BP in this group of  
24  
25 12 patients selected with complex disease and long diabetes duration. We did observe a time  
26  
27 13 trend in the data as the proportion of patients achieving the stringent BP target increased from  
28  
29 14 23% in 2001 to 44% in 2015. The same improvement trend over time was observed in the  
30  
31 15 proportion of patients achieving all three ABC targets; 7% in 2001 increasing to an average  
32  
33 16 of 16% from 2006 and forward in our material and in the NHANES data from 7% in 1999-  
34  
35 17 2002 to 19% in 2007-2010.  
36  
37  
38  
39  
40  
41  
42

#### 19 CVD risk

43  
44 20 To estimate the CVD risk in patients with type 2 diabetes is helpful to follow-up on treatment  
45  
46 21 and to target further measures to patients at risk. In this study we used two different CVD risk  
47  
48 22 engines to estimate the effect of the treatment program. The UKPDS risk engine is diabetes-  
49  
50 23 specific and has several advantages as it incorporates HbA<sub>1c</sub> and diabetes duration as  
51  
52 24 continuous variables (12). However, it is still not ideal as it is based on the patients recruited  
53  
54 25 by UKPDS for randomization in a clinical trial two decades ago before newer and more  
55  
56  
57  
58  
59  
60

1  
2  
3 1 effective treatments were available or widely used (e.g. statins, angiotensin converting  
4  
5 2 enzyme inhibitors and antidiabetic drugs). Accordingly, recent validation showed poor  
6  
7 3 calibration and overestimation of the CHD risk (23). A model that seems more suitable for  
8  
9 4 our population is the Swedish NDR risk model, which is based on a more recent and  
10  
11 5 nationwide population, reflecting a more diverse population and taking into account the  
12  
13 6 history of previous CVD and BMI. By using this model we found a relative reduction in the  
14  
15 7 estimated 5-year CVD risk of 16%, after approximately eight months, despite the increase in  
16  
17 8 age and diabetes duration. Notably, the fact that 26% of the patients had a prior CVD  
18  
19 9 diagnosis at baseline reflects the high risk profile and complexity of the population that was  
20  
21 10 referred to the treatment program. This of course does not normalise their actual risk, which  
22  
23 11 will still be high, but can be a motivating factor for the patients that there are some  
24  
25 12 modifiable risk factors that can reduce their risk. In comparison, the population used in the  
26  
27 13 Swedish model had a mean risk of 11.9% and a 5-year risk of fatal/non-fatal CVD of more  
28  
29 14 than 10% is defined as high risk. According to this 92% of our population was in high risk at  
30  
31 15 baseline. The UKPDS risk engine which estimates the risk of the first CHD event in 5 or 10  
32  
33 16 years, gives a lower 5 and 10 year risk estimate at baseline than the Swedish model, 7.4% and  
34  
35 17 17.1% respectively. This is nearly the same as the 10-year risk found in a NHANES  
36  
37 18 population from 2007 to 2012 of 16.5% if no risk factors were in control and 10.2% if all risk  
38  
39 19 factors were in control when using the same risk engine (24).

40  
41  
42 20 Interestingly, both the NDR and UKPDS risk engines estimated a higher risk reduction in  
43  
44 21 males than in females. This, perhaps expected finding, can be due to a relatively greater  
45  
46 22 HbA<sub>1c</sub> reduction seen in males, which is used in both the NDR and the UKPDS risk engines.  
47  
48 23 However, this alone could not explain the whole difference, as the gender difference  
49  
50 24 remained significant after excluding HbA<sub>1c</sub> from the equation. This in spite a higher  
51  
52 25 percentage of females achieved the metabolic targets.  
53  
54  
55  
56  
57  
58  
59  
60

1  
2  
3 14  
5 2 Strengths and limitations

6  
7 3 Strengths of this study include the validity of data with repeated recordings of the HbA<sub>1c</sub> and  
8  
9 4 BP at each visit, and that it includes a large cohort of patients treated under real-life  
10  
11 5 conditions such that results might have greater external validity than the highly selected  
12  
13 6 populations in randomized controlled trials (RCT). Still, we cannot rule out that there might  
14  
15 7 be a selection bias in terms of more motivated patients being referred to the clinic, and by  
16  
17 8 exclusion of those who did not show up.

19  
20 9 As a result of using a database and a register, we do not have complete data on all patients  
21  
22 10 and therefore the cohort size changes a bit as results are based on those without missing  
23  
24 11 values. Another limitation is that there is a lack of patient reported outcomes, such as adverse  
25  
26 12 events of drugs and general well-being. This was not possible to extract from the electronic  
27  
28 13 medical records. Furthermore we cannot be sure that the patients going through a treatment  
29  
30 14 program actually completed the program or was discharged for other reasons. It is also  
31  
32 15 important to acknowledge that most of the treatment programs analysed here were completed  
33  
34 16 before many of the new anti-diabetic treatments, as GLP1-analogs and sodium-glucose co-  
35  
36 17 transporter 2 (SGLT2)-inhibitors, were widely used and before acceptance of a more  
37  
38 18 personalized treatment as recommended in the position statement from ADA and EASD in  
39  
40 19 2012 (16). Another limitation of this study is the use of risk engines that only give an  
41  
42 20 estimate of the CVD or CHD risk and that UKPDS is based on a population many years prior  
43  
44 21 to ours and treatment guidelines were not the same.

45  
46 22 Meanwhile, the data serves as a baseline benchmark for real world data studies as to what can  
47  
48 23 be achieved in routine clinical practice before these treatments and guidelines get wider use  
49  
50 24 and implementation. The use of a more individualized treatment approach with involvement  
51  
52 25 of the patient in decision making is increasingly used in the treatment programs at the

1 moment and is expected to increase adherence to therapy. Furthermore, the combination of a  
2 more individualized HbA<sub>1c</sub> target and a broader selection of antidiabetic, antihypertensive  
3 and dyslipidaemia treatment will likely increase the proportion of patients achieving their  
4 treatment goals and thereby reduce their CVD risk and mortality. Specifically, since the  
5 EMPA-REG OUTCOME trial showed a 38% and the LEADER trial a 22% relative risk  
6 reduction in deaths from CVD events in patients with type 2 diabetes and a high risk of  
7 cardiovascular events (25, 26), this gives us further treatment options in this patient group.  
8 Therefore constant evaluation of the effects of our treatments on the risk of CVD or mortality  
9 is necessary. Combining these drugs, the treatment program evaluated here, and an  
10 individualized approach would be a logical next step for future studies.

## 12 Conclusion

13 This study of patients with type 2 diabetes who undergo structured treatment program lasting  
14 less than one year show that it is possible to increase the proportion of patients achieving the  
15 target levels for HbA<sub>1c</sub>, BP, and LDL, thereby reducing their estimated CVD and CHD risk.  
16 To the strengths of such a structured program we count the focus on treatment targets by a  
17 multidisciplinary team and the fact that it is time limited, which reduces clinical inertia and  
18 costs. Our results show that intensive treatment is not only effective in the RCT setting, but  
19 also in clinical practice and should encourage other health care systems to establish similar  
20 programs.

1  
2  
3 14  
5 2 **Conflicts of interest**

6  
7 3 NS, BC and HV were employed at Steno Diabetes Center A/S, now known as Steno Diabetes  
8  
9 4 Center Copenhagen and MR was employed there when the study was initiated. Steno  
10  
11 5 Diabetes Center A/S was a research hospital working in the Danish National Health Service  
12  
13 6 and owned by Novo Nordisk A/S. NS and BC own shares in Novo Nordisk A/S.

14  
15  
16 7 **Funding**

17  
18 8 This study has been funded by Innovation Fund Denmark

19  
20 9 **Contribution statement**

21  
22 10 NS and BC were responsible for data management and statistical analysis. NS and MR were  
23  
24 11 responsible for interpretation of data and writing of the article. HV was responsible  
25  
26 12 interpretation and critical revision of the article. All authors fully approved the final version  
27  
28 13 of the article.

29  
30  
31 14 **Data sharing statement**

32  
33 15 Clinical data will be available at request, but information on diagnosis and medication is not  
34  
35 16 allowed to be shared by the Danish National Patient Register or Statistics Denmark.

36  
37  
38  
39  
40 18 **Uncategorized References**

- 41 19 1. Guariguata L, Whiting DR, Hambleton I, Beagley J, Linnenkamp U, Shaw JE.  
42 20 Global estimates of diabetes prevalence for 2013 and projections for 2035. *Diabetes*  
43 21 *research and clinical practice*. 2014;103(2):137-49.  
44 22 2. Sarwar N, Gao P, Seshasai SR, Gobin R, Kaptoge S, Di Angelantonio E, et  
45 23 al. Diabetes mellitus, fasting blood glucose concentration, and risk of vascular disease: a  
46 24 collaborative meta-analysis of 102 prospective studies. *Lancet*. 2010;375(9733):2215-  
47 25 22.  
48 26 3. Holman RR, Paul SK, Bethel MA, Matthews DR, Neil HA. 10-year follow-up of  
49 27 intensive glucose control in type 2 diabetes. *The New England journal of medicine*.  
50 28 2008;359(15):1577-89.  
51 29 4. UKPDS. Effect of intensive blood-glucose control with metformin on  
52 30 complications in overweight patients with type 2 diabetes (UKPDS 34). *UK Prospective*  
53 31 *Diabetes Study (UKPDS) Group. Lancet*. 1998;352(9131):854-65.  
54 32 5. Gaede P, Vedel P, Larsen N, Jensen GV, Parving HH, Pedersen O.  
55 33 Multifactorial intervention and cardiovascular disease in patients with type 2 diabetes.  
56 34 *The New England journal of medicine*. 2003;348(5):383-93.



- 1 6. UKPDS. Intensive blood-glucose control with sulphonylureas or insulin  
2 compared with conventional treatment and risk of complications in patients with type 2  
3 diabetes (UKPDS 33). UK Prospective Diabetes Study (UKPDS) Group. *Lancet*.  
4 1998;352(9131):837-53.
- 5 7. Gaede P, Lund-Andersen H, Parving HH, Pedersen O. Effect of a  
6 multifactorial intervention on mortality in type 2 diabetes. *The New England journal of*  
7 *medicine*. 2008;358(6):580-91.
- 8 8. IDF Clinical Guidelines Task Force. Global guideline for Type 2  
9 diabetes. . Brussels: International Diabetes Federation; 2005.
- 10 9. Authors/Task Force M, Ryden L, Grant PJ, Anker SD, Berne C, Cosentino F,  
11 et al. ESC Guidelines on diabetes, pre-diabetes, and cardiovascular diseases developed  
12 in collaboration with the EASD: the Task Force on diabetes, pre-diabetes, and  
13 cardiovascular diseases of the European Society of Cardiology (ESC) and developed in  
14 collaboration with the European Association for the Study of Diabetes (EASD). *Eur Heart*  
15 *J*. 2013;34(39):3035-87.
- 16 10. Kotseva K, Wood D, De Backer G, De Bacquer D, Pyorala K, Reiner Z, et al.  
17 EUROASPIRE III. Management of cardiovascular risk factors in asymptomatic high-risk  
18 patients in general practice: cross-sectional survey in 12 European countries. *Eur J*  
19 *Cardiovasc Prev Rehabil*. 2010;17(5):530-40.
- 20 11. Alonso-Fernandez M, Mancera-Romero J, Mediavilla-Bravo JJ, Comas-  
21 Samper JM, Lopez-Simarro F, Perez-Unanua MP, et al. Glycemic control and use of A1c  
22 in primary care patients with type 2 diabetes mellitus. *Prim Care Diabetes*.  
23 2015;9(5):385-91.
- 24 12. Stevens RJ, Kothari V, Adler AI, Stratton IM, United Kingdom Prospective  
25 Diabetes Study G. The UKPDS risk engine: a model for the risk of coronary heart disease  
26 in Type II diabetes (UKPDS 56). *Clin Sci (Lond)*. 2001;101(6):671-9.
- 27 13. Zethelius B, Eliasson B, Eeg-Olofsson K, Svensson AM, Gudbjornsdottir S,  
28 Cederholm J, et al. A new model for 5-year risk of cardiovascular disease in type 2  
29 diabetes, from the Swedish National Diabetes Register (NDR). *Diabetes research and*  
30 *clinical practice*. 2011;93(2):276-84.
- 31 14. Sundhedsstyrelsen CfEoMT. Type 2-diabetes. Medicinsk teknologivurdering  
32 af screening, diagnostik og behandling 2003 [Available from:  
33 <https://www.sst.dk/~media/F42943CEAEC743DDAD8CB57FF55C9581.ashx>.  
34
- 35 15. Snorgaard O DT, Breum L et al. Farmakologisk behandling af type 2-  
36 diabetes – mål og algoritmer - 2014 2014 [Available from:  
37 <http://www.endocrinology.dk/PDF/FarmakologiskbehandlingDM2rev2014.pdf>.  
38
- 39 16. Inzucchi SE, Bergenstal RM, Buse JB, Diamant M, Ferrannini E, Nauck M, et  
40 al. Management of hyperglycaemia in type 2 diabetes: a patient-centered approach.  
41 Position statement of the American Diabetes Association (ADA) and the European  
42 Association for the Study of Diabetes (EASD). *Diabetologia*. 2012;55(6):1577-96.
- 43 17. Bloom S, Till S, Sonksen P, Smith S. Use of a biothesiometer to measure  
44 individual vibration thresholds and their variation in 519 non-diabetic subjects. *Br Med J*  
45 *(Clin Res Ed)*. 1984;288(6433):1793-5.
- 46 18. Kildemoes HW, Sorensen HT, Hallas J. The Danish National Prescription  
47 Registry. *Scand J Public Health*. 2011;39(7 Suppl):38-41.
- 48 19. Gaede P, Oellgaard J, Carstensen B, Rossing P, Lund-Andersen H, Parving  
49 HH, et al. Years of life gained by multifactorial intervention in patients with type 2  
50 diabetes mellitus and microalbuminuria: 21 years follow-up on the Steno-2 randomised  
51 trial. *Diabetologia*. 2016.
- 52 20. Tight blood pressure control and risk of macrovascular and microvascular  
53 complications in type 2 diabetes: UKPDS 38. UK Prospective Diabetes Study Group. *BMJ*.  
54 1998;317(7160):703-13.
- 55 21. Griffin SJ, Borch-Johnsen K, Davies MJ, Khunti K, Rutten GE, Sandbaek A,  
56 et al. Effect of early intensive multifactorial therapy on 5-year cardiovascular outcomes  
in individuals with type 2 diabetes detected by screening (ADDITION-Europe): a cluster-  
randomised trial. *Lancet*. 2011;378(9786):156-67.



1  
2  
3  
4  
5  
6  
7  
8  
9  
10  
11  
12  
13  
14  
15  
16  
17  
18  
19  
20  
21  
22  
23  
24  
25  
26  
27  
28  
29  
30  
31  
32  
33  
34  
35  
36  
37  
38  
39  
40  
41  
42  
43  
44  
45  
46  
47  
48  
49  
50  
51  
52  
53  
54  
55  
56  
57  
58  
59  
60

22. Stark Casagrande S, Fradkin JE, Saydah SH, Rust KF, Cowie CC. The prevalence of meeting A1C, blood pressure, and LDL goals among people with diabetes, 1988-2010. *Diabetes Care*. 2013;36(8):2271-9.
23. Bannister CA, Poole CD, Jenkins-Jones S, Morgan CL, Elwyn G, Spasic I, et al. External validation of the UKPDS risk engine in incident type 2 diabetes: a need for new type 2 diabetes-specific risk equations. *Diabetes Care*. 2014;37(2):537-45.
24. Wong ND, Patao C, Malik S, Iloeje U. Preventable coronary heart disease events from control of cardiovascular risk factors in US adults with diabetes (projections from utilizing the UKPDS risk engine). *Am J Cardiol*. 2014;113(8):1356-61.
25. Zinman B, Wanner C, Lachin JM, Fitchett D, Bluhmki E, Hantel S, et al. Empagliflozin, Cardiovascular Outcomes, and Mortality in Type 2 Diabetes. *The New England journal of medicine*. 2015;373(22):2117-28.
26. Marso SP, Daniels GH, Brown-Frandsen K, Kristensen P, Mann JF, Nauck MA, et al. Liraglutide and Cardiovascular Outcomes in Type 2 Diabetes. *The New England journal of medicine*. 2016;375(4):311-22.

## Figure legends

Figure 1 - Flow chart of the treatment program. Visit A: Visit at the laboratory, eye clinic and consultation with nurse. Visit B: Consultation with nurse, dietician and physician. Visit C1 and C2: Individual program with nurse. Group sessions: Module A: 'Me and my diabetes'. Module B: 'My feet and physical activity'. Module C: 'My diet'. Module D: 'My motivation and future lifestyle plans'. Visit C: Consultation with nurse and dietician. Visit D: Final visit with nurse, dietician and endocrinologist. After approximately 8 months patients with no complications are referred back to general practice and those with micro- or macrovascular complications are referred to the outpatient clinic.

Figure 2 - Proportion of patients achieving the treatment targets for HbA<sub>1c</sub>, LDL cholesterol, systolic and diastolic blood pressure at baseline and at follow-up.

Figure 3 - Proportion of patients on pharmacological treatment at baseline and follow-up.

**Table 1 Baseline characteristics of the study cohort**

|                                         | N     | All             | Females ( <i>n</i> = 1,732) | Males ( <i>n</i> = 2,567) |
|-----------------------------------------|-------|-----------------|-----------------------------|---------------------------|
| Age (years)                             | 4,299 | 59.3 (12.4)     | 59.9 (12.9)                 | 58.9 (12.1)               |
| Weight (kg)                             | 4,256 | 91.5 (21.2)     | 84.4 (20.4)                 | 96.3 (20.4)               |
| Body mass index (kg/m <sup>2</sup> )    | 4,236 | 31.0 (6.6)      | 31.8 (7.4)                  | 30.3 (4.4)                |
| Smokers, N (%)                          | 4,071 | 1,629 (37.9)    | 622 (35.9)                  | 1,007 (39.5)              |
| Caucasians, N (%)                       | 4,289 | 3,724 (87)      | 1,457 (84)                  | 2,267 (89)                |
| Diabetes and complications              |       |                 |                             |                           |
| Duration of type 2 diabetes (years)     | 4,252 | 7.1 (6.5)       | 7.3 (6.6)                   | 6.9 (6.5)                 |
| Diabetes duration < 1 year, N (%)       | 4,252 | 828 (19.5)      | 311 (18.1)                  | 517 (20.4)                |
| GAD65 antibodies ≥25 U/mL, N (%)        | 2,376 | 116 (2.7)       | 59 (3.4)                    | 57 (2.2)                  |
| HbA <sub>1c</sub> (%)                   | 4,253 | 8.2 (3.9)       | 8.1 (3.9)                   | 8.2 (19)                  |
| HbA <sub>1c</sub> (mmol/mol)            | 4,253 | 66 (19)         | 65 (19)                     | 66 (19)                   |
| Fasting p-glucose (mmol/L)              | 2,850 | 9.9 (3.6)       | 9.6 (3.4)                   | 10.0 (3.7)                |
| Fasting c-peptide (pmol/L) Median (IQR) | 2,898 | 1050 (706-1500) | 1050 (699-1517)             | 1050 (711-1478)           |
| Prior cardiovascular disease, N (%)†    | 4,299 | 1,127 (26)      | 400 (23)                    | 727 (28)                  |
| Microalbuminuria, N (%)                 | 4,299 | 787 (18)        | 254 (15)                    | 533 (21)                  |
| Macroalbuminuria, N (%)                 | 4,299 | 211 (5)         | 47 (3)                      | 164 (6)                   |
| eGFR (mL/min)                           | 1,335 | 78 (17)         | 77 (18)                     | 79 (16)                   |
| Simple retinopathy, N (%)               | 3,859 | 1134 (29)       | 422 (27)                    | 712 (31)                  |
| Proliferative retinopathy, N (%)        | 3,859 | 56 (1)          | 25 (2)                      | 31 (1)                    |
| Peripheral neuropathy, N (%)            | 2,343 | 549 (23)        | 140 (15)                    | 409 (29)                  |
| Blood pressure                          |       |                 |                             |                           |
| Systolic blood pressure (mm Hg)         | 4,280 | 141.7 (21.7)    | 140.5 (22.5)                | 142.6 (21.1)              |

**Table 1 Baseline characteristics of the study cohort**

|                                     | N     | All           | Females ( <i>n</i> = 1,732) | Males ( <i>n</i> = 2,567) |
|-------------------------------------|-------|---------------|-----------------------------|---------------------------|
| Diastolic blood pressure (mm Hg)    | 4,280 | 82.5 (11.5)   | 80.8 (11.4)                 | 83.6 (11.5)               |
| Lipids                              |       |               |                             |                           |
| Total cholesterol (mmol/L)          | 3,946 | 4.7 (1.2)     | 4.9 (1.3)                   | 4.6 (1.2)                 |
| LDL cholesterol (mmol/L)            | 3,946 | 2.5 (1.0)     | 2.6 (1.0)                   | 2.5 (1.0)                 |
| HDL cholesterol (mmol/L)            | 3,946 | 1.2 (0.4)     | 1.3 (0.4)                   | 1.2 (0.4)                 |
| Triglycerides (mmol/L) Median (IQR) | 3,946 | 1.7 (1.2–2.5) | 1.7 (1.2–2.5)               | 1.7 (1.2–2.6)             |
| Medication                          |       |               |                             |                           |
| Metformin, N (%)                    | 4,299 | 2511 (58)     | 1025 (59)                   | 1486 (58)                 |
| Sulfonylurea, N (%)                 | 4,299 | 1652 (38)     | 673 (39)                    | 979 (38)                  |
| DPP-4 inhibitor, N (%)              | 4,299 | 303 (7)       | 126 (7)                     | 177 (7)                   |
| GLP-1 analogue, N (%)               | 4,299 | 168 (4)       | 73 (4)                      | 95 (4)                    |
| Insulin, N (%)                      | 4,299 | 836 (19)      | 346 (20)                    | 490 (19)                  |
| Other OAD, N (%)                    | 4,299 | 179 (4)       | 67 (4)                      | 112 (4)                   |
| RAS blockade, N (%)                 | 4,299 | 2027 (47)     | 736 (17)                    | 1291(30)                  |
| All antihypertensive drugs, N (%)   | 4,299 | 2678 (62)     | 1099 (26)                   | 1579 (37)                 |
| Lipid lowering drug, N (%)          | 4,299 | 1988 (46)     | 776 (45)                    | 1212 (47)                 |
| Acetylsalicylic acid, N (%)         | 4,299 | 1538 (36)     | 530 (31)                    | 1008 (39)                 |

Values are means (SDs) unless stated otherwise.

†Prior CVD was defined as one or more of the following: myocardial infarction, heart surgery, ischaemic heart disease, heart insufficiency, vascular surgery, stroke, transitory cerebral ischaemia, amputation.

CVD, cardiovascular disease; GAD, glutamic acid decarboxylase; HbA<sub>1c</sub>, haemoglobin A<sub>1c</sub>; HDL, high-density lipoprotein; LDL, low-density lipoprotein; DPP-4, Dipeptidyl peptidase 4; GLP-1, Glucagon-like peptide 1; OAD, oral antidiabetic drug; RAS, Renin angiotensin system.

**Table 2 Estimated CVD or CHD risk**

|                                                | Baseline                      | Follow-up                       |
|------------------------------------------------|-------------------------------|---------------------------------|
| Estimated CVD 5-year risk: NDR Risk engine:    |                               |                                 |
| All                                            | 29.8 (19.6-44.6) <sup>a</sup> | 25.0 (16.6-37.4) <sup>b,*</sup> |
| F                                              | 24.9 (15.9-37.0)              | 21.1 (13.7-31.1)*               |
| M                                              | 34.0 (22.6-48.2)              | 28.1 (19.1-41.2)*               |
| Estimated CHD 5-year risk: UKPDS Risk Engine:  |                               |                                 |
| All                                            | 7.4 (3.9-13.7) <sup>c</sup>   | 5.0 (2.7-9.2) <sup>d,*</sup>    |
| F                                              | 4.8 (2.6-8.7)                 | 3.3 (1.9-5.9)*                  |
| M                                              | 9.6 (5.3-16.7)                | 6.4 (3.7-11.3)*                 |
| Estimated CHD 10-year risk: UKPDS Risk Engine: |                               |                                 |
| All                                            | 17.1 (9.3-30.4) <sup>c</sup>  | 11.8 (6.5-21.1) <sup>d,*</sup>  |
| F                                              | 11.4 (6.1-20.0)               | 7.9 (4.5-14.0)*                 |
| M                                              | 22.1 (12.6-36.2)              | 15.0 (9.0-25.4)*                |

Estimated CVD risk according to the Swedish National Register (NDR) risk engine and the estimated CHD risk according to the UKPDS risk engine. Data is median risk in % (IQR).

a  $n = 3,865$ ; b  $n = 3,730$ ; c  $n = 3,895$ ; d  $n = 3,757$ , \*  $P < 0.0001$ .

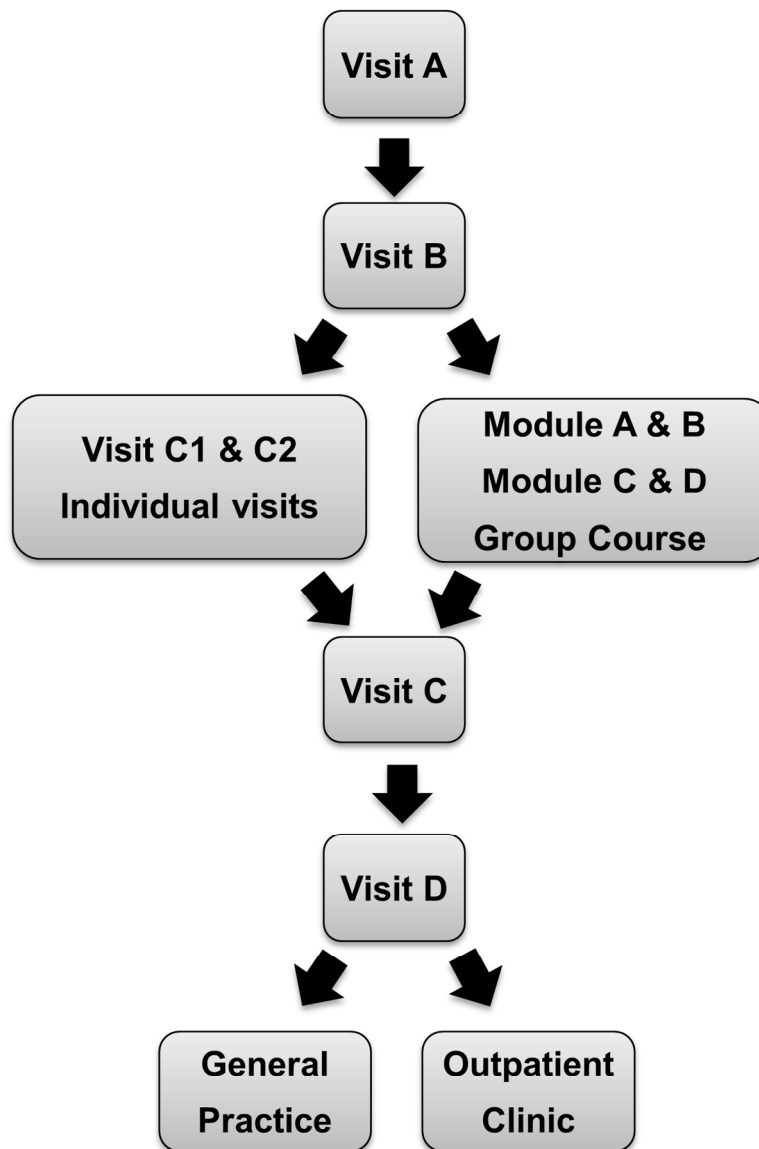

Figure 1 - Flow chart of the treatment program. Visit A: Visit at the laboratory, eye clinic and consultation with nurse. Visit B: Consultation with nurse, dietician and physician. Visit C1 and C2: Individual program with nurse. Group sessions: Module A: 'Me and my diabetes'. Module B: 'My feet and physical activity'. Module C: 'My diet'. Module D: 'My motivation and future lifestyle plans'. Visit C: Consultation with nurse and dietician. Visit D: Final visit with nurse, dietician and endocrinologist. After approximately 8 months patients with no complications are referred back to general practice and those with micro- or macrovascular complications are referred to the outpatient clinic.

121x170mm (300 x 300 DPI)

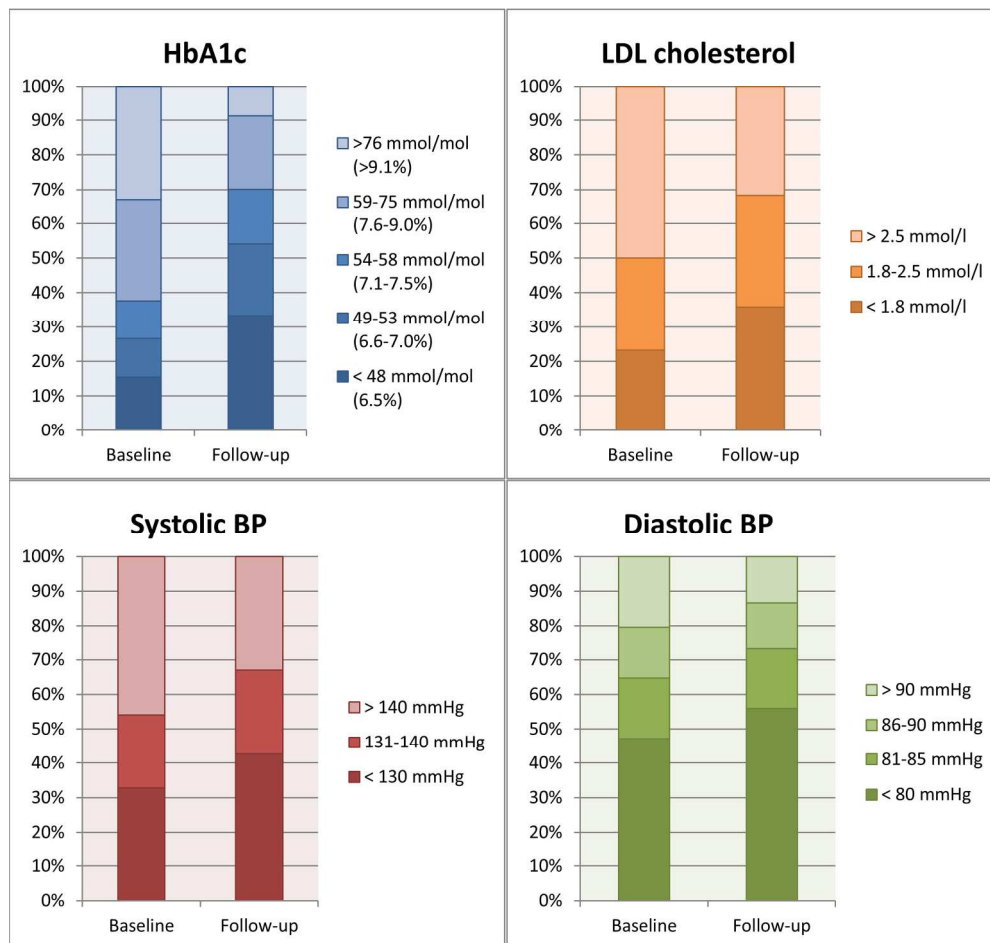

Figure 2 - Proportion of patients achieving the treatment targets for HbA1c, LDL cholesterol, systolic and diastolic blood pressure at baseline and at follow-up.

183x174mm (300 x 300 DPI)

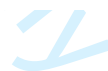

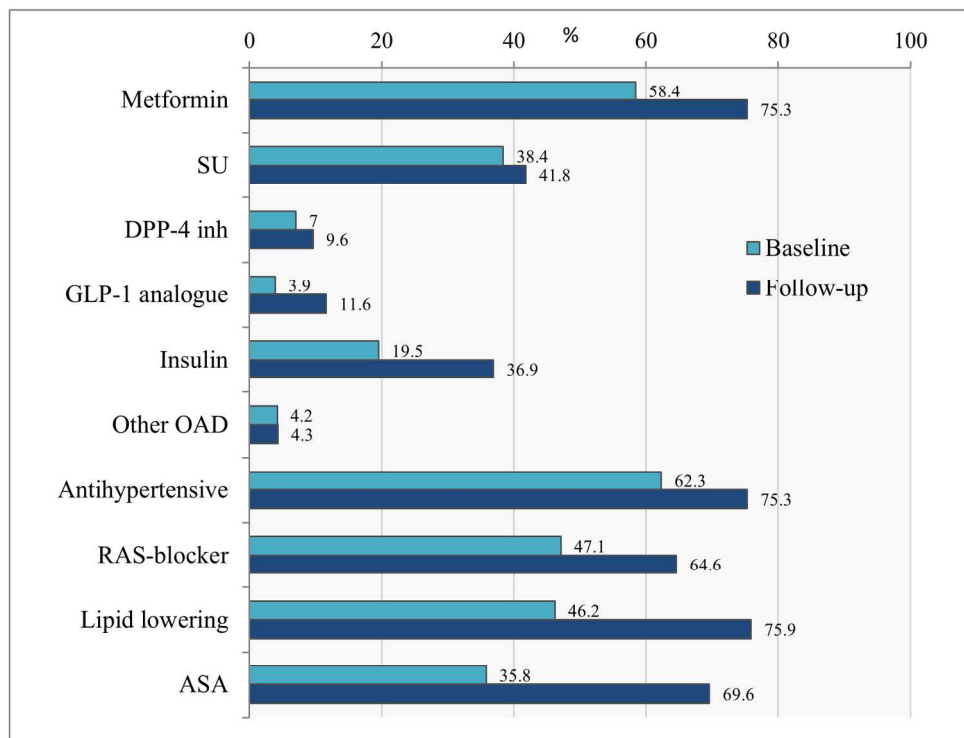

Figure 3 - Proportion of patients on pharmacological treatment at baseline and follow-up.

156x120mm (300 x 300 DPI)

**STROBE 2007 (v4) Statement—Checklist of items that should be included in reports of *cohort studies***

| Section/Topic                | Item # | Recommendation                                                                                                                                                                       | Reported on page # |
|------------------------------|--------|--------------------------------------------------------------------------------------------------------------------------------------------------------------------------------------|--------------------|
| Title and abstract           | 1      | (a) Indicate the study's design with a commonly used term in the title or the abstract                                                                                               | 1                  |
|                              |        | (b) Provide in the abstract an informative and balanced summary of what was done and what was found                                                                                  | 2                  |
| <b>Introduction</b>          |        |                                                                                                                                                                                      |                    |
| Background/rationale         | 2      | Explain the scientific background and rationale for the investigation being reported                                                                                                 | 4                  |
| Objectives                   | 3      | State specific objectives, including any prespecified hypotheses                                                                                                                     | 4-5                |
| <b>Methods</b>               |        |                                                                                                                                                                                      |                    |
| Study design                 | 4      | Present key elements of study design early in the paper                                                                                                                              | 5-6                |
| Setting                      | 5      | Describe the setting, locations, and relevant dates, including periods of recruitment, exposure, follow-up, and data collection                                                      | 5-6                |
| Participants                 | 6      | (a) Give the eligibility criteria, and the sources and methods of selection of participants. Describe methods of follow-up                                                           | 6                  |
|                              |        | (b) For matched studies, give matching criteria and number of exposed and unexposed                                                                                                  |                    |
| Variables                    | 7      | Clearly define all outcomes, exposures, predictors, potential confounders, and effect modifiers. Give diagnostic criteria, if applicable                                             | 6-7                |
| Data sources/<br>measurement | 8*     | For each variable of interest, give sources of data and details of methods of assessment (measurement). Describe comparability of assessment methods if there is more than one group | 6-7                |
| Bias                         | 9      | Describe any efforts to address potential sources of bias                                                                                                                            |                    |
| Study size                   | 10     | Explain how the study size was arrived at                                                                                                                                            |                    |
| Quantitative variables       | 11     | Explain how quantitative variables were handled in the analyses. If applicable, describe which groupings were chosen and why                                                         | 6-7                |
| Statistical methods          | 12     | (a) Describe all statistical methods, including those used to control for confounding                                                                                                | 8                  |
|                              |        | (b) Describe any methods used to examine subgroups and interactions                                                                                                                  | 8                  |
|                              |        | (c) Explain how missing data were addressed                                                                                                                                          | 8                  |
|                              |        | (d) If applicable, explain how loss to follow-up was addressed                                                                                                                       |                    |
|                              |        | (e) Describe any sensitivity analyses                                                                                                                                                |                    |
| <b>Results</b>               |        |                                                                                                                                                                                      |                    |



|                          |     |                                                                                                                                                                                                              |              |
|--------------------------|-----|--------------------------------------------------------------------------------------------------------------------------------------------------------------------------------------------------------------|--------------|
| Participants             | 13* | (a) Report numbers of individuals at each stage of study—eg numbers potentially eligible, examined for eligibility, confirmed eligible, included in the study, completing follow-up, and analysed            | 6            |
|                          |     | (b) Give reasons for non-participation at each stage                                                                                                                                                         | 6            |
|                          |     | (c) Consider use of a flow diagram                                                                                                                                                                           |              |
| Descriptive data         | 14* | (a) Give characteristics of study participants (eg demographic, clinical, social) and information on exposures and potential confounders                                                                     | 9            |
|                          |     | (b) Indicate number of participants with missing data for each variable of interest                                                                                                                          | 21 (Table 1) |
|                          |     | (c) Summarise follow-up time (eg, average and total amount)                                                                                                                                                  | 9            |
| Outcome data             | 15* | Report numbers of outcome events or summary measures over time                                                                                                                                               | 9-10         |
| Main results             | 16  | (a) Give unadjusted estimates and, if applicable, confounder-adjusted estimates and their precision (eg, 95% confidence interval). Make clear which confounders were adjusted for and why they were included | 9-10         |
|                          |     | (b) Report category boundaries when continuous variables were categorized                                                                                                                                    | 9-10         |
|                          |     | (c) If relevant, consider translating estimates of relative risk into absolute risk for a meaningful time period                                                                                             |              |
| Other analyses           | 17  | Report other analyses done—eg analyses of subgroups and interactions, and sensitivity analyses                                                                                                               |              |
| <b>Discussion</b>        |     |                                                                                                                                                                                                              |              |
| Key results              | 18  | Summarise key results with reference to study objectives                                                                                                                                                     | 11           |
| <b>Limitations</b>       |     |                                                                                                                                                                                                              |              |
| Interpretation           | 20  | Give a cautious overall interpretation of results considering objectives, limitations, multiplicity of analyses, results from similar studies, and other relevant evidence                                   | 12-14        |
| Generalisability         | 21  | Discuss the generalisability (external validity) of the study results                                                                                                                                        | 14-15        |
| <b>Other information</b> |     |                                                                                                                                                                                                              |              |
| Funding                  | 22  | Give the source of funding and the role of the funders for the present study and, if applicable, for the original study on which the present article is based                                                | 17           |

\*Give information separately for cases and controls in case-control studies and, if applicable, for exposed and unexposed groups in cohort and cross-sectional studies.

**Note:** An Explanation and Elaboration article discusses each checklist item and gives methodological background and published examples of transparent reporting. The STROBE checklist is best used in conjunction with this article (freely available on the Web sites of PLoS Medicine at <http://www.plosmedicine.org/>, Annals of Internal Medicine at <http://www.annals.org/>, and Epidemiology at <http://www.epidem.com/>). Information on the STROBE Initiative is available at [www.strobe-statement.org](http://www.strobe-statement.org).

# BMJ Open

## Impact of a multifactorial treatment program on clinical outcomes and cardiovascular risk estimates: a retrospective cohort study from a specialized diabetes centre in Denmark

|                                 |                                                                                                                                                                                                                                                                                                                                                                                                                                 |
|---------------------------------|---------------------------------------------------------------------------------------------------------------------------------------------------------------------------------------------------------------------------------------------------------------------------------------------------------------------------------------------------------------------------------------------------------------------------------|
| Journal:                        | <i>BMJ Open</i>                                                                                                                                                                                                                                                                                                                                                                                                                 |
| Manuscript ID                   | bmjopen-2017-019214.R2                                                                                                                                                                                                                                                                                                                                                                                                          |
| Article Type:                   | Research                                                                                                                                                                                                                                                                                                                                                                                                                        |
| Date Submitted by the Author:   | 23-Jan-2018                                                                                                                                                                                                                                                                                                                                                                                                                     |
| Complete List of Authors:       | Safai, Narges; Steno Diabetes Center Copenhagen, Patient Care<br>Carstensen, Bendix; Steno Diabetes Center Copenhagen, Department of Clinical Epidemiology<br>Vestergaard, Henrik; The Novo Nordisk Foundation, Center for Basic Metabolic Research, Section of Metabolic Genetics; Steno Diabetes Center Copenhagen, Patient Care<br>Ridderstråle, Martin; Novo Nordisk AS; Lunds Universitet, Department of Clinical Sciences |
| <b>Primary Subject Heading</b>: | Diabetes and endocrinology                                                                                                                                                                                                                                                                                                                                                                                                      |
| Secondary Subject Heading:      | Epidemiology, Diabetes and endocrinology, Medical management                                                                                                                                                                                                                                                                                                                                                                    |
| Keywords:                       | Type 2 diabetes, Glycemic control, Outcomes, CVD risk, Multifactorial treatment                                                                                                                                                                                                                                                                                                                                                 |
|                                 |                                                                                                                                                                                                                                                                                                                                                                                                                                 |

SCHOLARONE™  
Manuscripts

only

1  
2  
3  
4 **Title page**

5  
6  
7 **Impact of a multifactorial treatment program on clinical outcomes and cardiovascular**  
8 **risk estimates: a retrospective cohort study from a specialized diabetes centre in**  
9 **Denmark**  
10  
11  
12

13  
14  
15  
16 Narges Safai<sup>a</sup>, Bendix Carstensen<sup>b</sup>, Henrik Vestergaard<sup>c</sup> and Martin Ridderstråle<sup>d</sup>

17  
18 <sup>a</sup> Steno Diabetes Center Copenhagen, Gentofte, Denmark; narges.safai@regionh.dk

19  
20 <sup>b</sup> Steno Diabetes Center Copenhagen, Gentofte, Denmark; bendix.carstensen@regionh.dk

21  
22 <sup>c</sup> Novo Nordisk Foundation of Basic Metabolic Research, University of Copenhagen,  
23  
24 Denmark; Henrik.vestergaard@sund.ku.dk

25  
26 <sup>d</sup> Novo Nordisk A/S, Søborg, Denmark and Department of Clinical Sciences, Lund  
27  
28 University, Malmö, Sweden; mtrd@novonordisk.com  
29  
30

31  
32  
33 Corresponding author:

34  
35 Narges Safai, MD

36  
37 Steno Diabetes Center Copenhagen

38  
39 Niels Steensens Vej 2-4

40  
41 DK-2820 Gentofte

42  
43 Denmark

44  
45 +45 3091 3395 (direct)

46  
47  
48 [narges.safai@regionh.dk](mailto:narges.safai@regionh.dk)

49  
50 Number of tables: 2

51  
52 Number of figures: 3

53  
54  
55  
56  
57  
58  
59  
60

1  
2  
3 **1 Abstract**

4 **2 Objectives:** To investigate the impact of a multifactorial treatment program in a real-life

5  
6 3 setting on clinical outcomes and estimated cardiovascular disease (CVD) risk.

7  
8 4 **Design:** A retrospective observational cohort study, using data from the electronic medical

9  
10 5 records and national registers.

11  
12 6 **Setting:** Tertiary diabetes centre in Denmark.

13  
14 7 **Participants:** Patients with type 2 diabetes ( $n=4,299$ ) referred to a program with focus on

15  
16 8 treatment of hyperglycaemia, hypertension and dyslipidaemia, between Jan 1<sup>st</sup> 2001 and

17  
18 9 April 1<sup>st</sup> 2016.

19  
20  
21 10 **Outcomes:** Primary outcomes were changes in HbA<sub>1c</sub>, blood pressure and LDL cholesterol

22  
23 11 as well as proportion reaching treatment targets. Our secondary outcome was to investigate

24  
25 12 changes in antidiabetic, antihypertensive and lipid lowering treatment, together with the

26  
27 13 impact on estimated CVD risk. Linear mixed model for repeated measurements were used for

28  
29 14 continuous variables and logistic regression for dichotomous variables.

30  
31 15 **Results:** The patients achieved a mean  $\pm$  SD decrease in HbA<sub>1c</sub>, systolic and diastolic blood

32  
33 16 pressure (BP), and LDL cholesterol of  $1.0\pm 0.04\%$  ( $10.6\pm 0.4$  mmol/mol),  $6.3\pm 0.4$  mmHg,

34  
35 17  $2.7\pm 0.2$  mmHg and  $0.32\pm 0.02$  mmol/l, respectively ( $p<0.0001$ ). The proportion of patients

36  
37 18 who met the treatment goal for HbA<sub>1c</sub> ( $<7\%$  [ $<53$ mmol/mol]) increased from 31% to 58% ( $p$

38  
39 19  $<0.0001$ ); for BP ( $<130/80$  mm Hg) from 24% to 34% ( $p <0.0001$ ), and for LDL cholesterol

40  
41 20 ( $<2.5$  mmol/l (patients without previous CVD) or  $<1.8$  mmol/l (patients with previous CVD))

42  
43 21 from 52% to 65%. Those reaching all three guideline treatment targets increased from 4% to

44  
45 22 15% ( $p<0.0001$ ), and when relaxing the BP target to  $<140/85$  from 8% to 24%. The estimated

46  
47 23 CVD risk was relatively reduced by 15.2% using the Swedish National Diabetes Register

48  
49 24 Risk Engine and 30.9% using the UKPDS risk engine.

1  
2  
3  
4  
5  
6  
7  
8  
9  
10  
11  
12  
13  
14  
15  
16  
17  
18  
19  
20  
21  
22  
23  
24  
25  
26  
27  
28  
29  
30  
31  
32  
33  
34  
35  
36  
37  
38  
39  
40  
41  
42  
43  
44  
45  
46  
47  
48  
49  
50  
51  
52  
53  
54  
55  
56  
57  
58  
59  
60

**Conclusions:** Our data supports that short term multifactorial treatment of patients with glycaemic dysregulation in a specialist outpatient setting is both achievable and effective, and associated with a clinically meaningful improvement in CVD risk.

#### **Strengths and limitations of this study**

- Large cohort of dysregulated patients with type 2 diabetes under real-world conditions and strong validity of data with repeated recordings of clinical measurements and access to national registries.
- Selection bias in terms of more motivated and high risk patients being referred to the clinic, and by exclusion of those who did not show up.
- The use of risk engines can only give an estimate of the CVD risk and the UKPDS risk engine is based on a population many years prior to ours where treatment guidelines were different.

**Keywords:** Type 2 diabetes, glycaemic control, outcomes, CVD risk and multifactorial treatment

## 1 **Introduction**

2 Type 2 diabetes is an increasing global health threat. It is estimated that 439 million people  
3 will be diagnosed with diabetes by 2030 (1). Type 2 diabetes is associated with an increased  
4 risk of microvascular complications such as nephropathy, neuropathy, and retinopathy as well  
5 as macrovascular disease, resulting in a decreased life expectancy and substantial personal  
6 and societal expenses (2). Ensuring good glycaemic control remains the most effective  
7 therapeutic measure to reduce the risk of developing microvascular disease (3, 4).

8 Multifactorial treatment with tight control of glycaemia, blood pressure (BP) and lipids,  
9 accompanied by acetylsalicylic acid and lifestyle advice, is known to reduce progression of  
10 microvascular complications, cardiovascular disease (CVD), and mortality by 50% in patients  
11 with type 2 diabetes and microalbuminuria (5-7). Consequently, diabetes guidelines have  
12 advocated an intensified treatment approach aiming at addressing and reducing all CVD risk  
13 factors in patients with diabetes since several years (8, 9).

14  
15 For most patients, sufficient glycaemic, BP and lipid control can be achieved in a primary  
16 care setting but in high risk patients, or in patients with complex treatment regimens, the  
17 proportion of patients who achieve metabolic control in primary care is lower (10, 11). In this  
18 situation, in most health care systems, high risk patients are referred to specialist clinics for  
19 evaluation. A broad risk factor intervention in this subgroup has proven particularly effective  
20 in the Steno-2 study (5). However, it remains unknown whether the results seen in the study  
21 setting can be achieved in clinical practice.

22  
23 The overall aim of this study was to describe how the multifactorial intervention methods  
24 from the Steno-2 study perform in a larger scale clinical setting. Our primary objective was to  
25 describe changes in metabolic outcomes as a result of such structured short term intervention

1 and to test for gender differences. Our secondary objective was to describe the  
2 pharmacological changes and to evaluate the impact on estimated CVD risk by using two  
3 different risk assessment tools: the UKPDS Risk Engine (12), and the 5-year Swedish  
4 National Diabetes Registry (NDR) risk model (13).

## 5 6 **Methods**

### 7 **Design and setting**

8 This study is based on patients referred to Steno Diabetes Center (SDC), a tertiary  
9 multidisciplinary and highly specialized diabetes centre in the Capital Region of Denmark. It  
10 serves as one out of three referral centres with a catchment area of over 1.7 million people  
11 and provides diabetes care on a permanent basis to about 5.600 patients. During the Steno-2  
12 study, SDC designed a treatment program algorithm specifically for patients with type 2  
13 diabetes and glycaemic dysregulation. The primary goal of the program is to improve patient  
14 quality of life and reduce mortality by prevention of acute and chronic complications of  
15 diabetes. This is done by motivating and encouraging self-management, professional support  
16 in behavioural changes, and pharmacological treatment according to national and  
17 international guidelines. The SDC Type 2 Clinic (T2C) opened in 2001, providing care for  
18 patients referred from general practitioners (GPs) or other hospitals in the region. Patients  
19 were referred to the clinic either as newly diagnosed with a need for education and start of  
20 treatment, requiring a shift to insulin treatment, having micro- or macrovascular  
21 complications, or having glycaemic dysregulation in spite of attempts to control the disease  
22 by the GP. The program, which is still running and is the same for all patients, involves a  
23 consultation with a nurse, a dietician, and a physician in a structured order with specific  
24 assignments and is comparable to the intensive treatment arm of the Steno-2 study (Figure 1).  
25 The individual visits are, depending on the need, complemented by optional group-based

1 theme sessions with the overall aim of facilitating patient empowerment and with phone  
2 consultations from a nurse. The treatment program consist of self-management training with  
3 a focus on knowledge, lifestyle behaviour including diet, physical activity and smoking  
4 cessation, skills to improve glycaemic control such as self-monitoring of blood glucose and  
5 skills to prevent and identify complications. Furthermore, there is focus on pharmacological  
6 treatment of hyperglycaemia, hypertension and dyslipidaemia. After approximately eight  
7 months, patients were evaluated for referral back to their GP, or to continue at the SDC  
8 outpatient clinic. The structure of program has remained unchanged in the study period while  
9 e.g. medications used have followed updated treatment guidelines. The Danish treatment  
10 guidelines have followed the international guidelines from EASD and ADA and were revised  
11 in 2003, 2011 and 2014 (14-16). We defined the baseline and evaluation follow-up visits as  
12 the first and last visit to the T2C, respectively. This study is a retrospective observational  
13 study with demographics, clinical, and laboratory information extracted from the electronic  
14 medical records and laboratory database of SDC.

## 15 16 Study population

17 We included all patients who had finalized a treatment program between 1<sup>st</sup> of January 2001  
18 and 1<sup>st</sup> of April 2016 ( $n = 4,489$ ), and to avoid no-shows, once off or very brief consultations  
19 we excluded patients with a treatment duration under 30 days (i.e. between the baseline and  
20 follow-up visits,  $n = 190$ ). We ended up with a total of  $n = 4,299$  patients. 16% of the patients  
21 were subsequently re-referred to the clinic, but we only included their first treatment program  
22 here. All data was anonymized prior to analysis.

## 23 24 Subject characteristics



1  
2  
3 1 Laboratory analyses at the baseline visit were encouraged to be fasting and included: glucose,  
4  
5 2 HbA<sub>1c</sub>, haemoglobin, creatinine, total-cholesterol, high-density lipoprotein-cholesterol (HDL)  
6  
7 3 cholesterol, low-density lipoprotein (LDL) cholesterol, triglycerides (TG), C-peptide and  
8  
9 4 urine albumin. At all in-between visits and at follow-up an HbA<sub>1c</sub>, BP and weight were  
10  
11 5 measured. All laboratory and anthropometric measurements were recorded using  
12  
13 6 standardized procedures at the SDC accredited laboratory (ISO 15189). Body mass index  
14  
15 7 (BMI) was calculated from weight and height (kg/m<sup>2</sup>). A person was considered overweight  
16  
17 8 at BMI  $\geq 25$  kg/m<sup>2</sup>, and obese at BMI  $\geq 30$  kg/m<sup>2</sup>. For BP and heart rate automated  
18  
19 9 oscillometric blood pressure recorders were used (AND UA-787plus, A&D medical,  
20  
21 10 California, USA). Smoking status was obtained at every visit.  
22  
23  
24  
25

## 26 12 Diabetes complications and pharmacological treatment

27  
28 13 Micro albuminuria was here defined as a morning urine sample with urine albumin of 30-300  
29  
30 14 mg/L or urine albumin to creatinine ratio  $> 30$  mg/g to 300 mg/g at the first visit. Macro  
31  
32 15 albuminuria likewise but with a value  $> 300$  mg/L or  $> 300$  mg/g. Peripheral neuropathy was  
33  
34 16 defined by examining vibration sensation with a biothesiometer and using an age-adjusted  
35  
36 17 threshold (17). Information on cardiovascular disease was obtained from The National Patient  
37  
38 18 Register and included diagnosis from 1977 till 2015 and procedures from 1995 till 2015.  
39  
40 19 Prior CVD was defined as one or more of the following: myocardial infarction, heart surgery,  
41  
42 20 ischaemic heart disease, heart insufficiency, atrial fibrillation, vascular surgery, stroke,  
43  
44 21 transitory cerebral ischaemia and amputations using ICD-8 and ICD-10 codes.  
45  
46 22 Information on medication was obtained by Register of Medicinal Products Statistics, where  
47  
48 23 individual-level data on all prescription drugs sold in Danish community pharmacies since  
49  
50 24 1994 has been recorded and administered by Statistics Denmark (18). A person was defined  
51  
52 25 as being on a treatment at baseline if they had purchased a prescribed drug less than 180 days  
53  
54  
55  
56  
57  
58  
59  
60

1 before their first visit and at follow-up if they purchased a prescribed drug after their first  
2 visit and less than 30 days after their last visit.

3 Permission to use data has been obtained from the Danish Data Protection Agency (ref.  
4 number: 2007-58-0015) and from the Danish Patient Safety Authority. According to Danish  
5 Committee law register studies do not require an approval from the National Committee on  
6 Health Research Ethics.

## 7 8 CVD risk

9 To evaluate the effect of changes in metabolic outcomes on the estimated risk of CVD, we  
10 calculated CVD risk at baseline and at follow-up using two different risk assessment tools: a  
11 Swedish risk model specific for type 2 diabetes (13) and the UKPDS Risk Engine (12). The  
12 Swedish model is based on patients with type 2 diabetes using 12 predictors: sex, age,  
13 diabetes duration, TG, HDL cholesterol, HbA<sub>1c</sub>, systolic BP, BMI, smoking status,  
14 albuminuria, atrial fibrillation and previous CVD. It is derived from a large observational  
15 sample of patients ( $n = 24,288$ ) in the Swedish National Diabetes Register (NDR) followed  
16 from 2002 to 2007 and estimates the 5-year risk of CVD. The UKPDS Risk Engine is also  
17 type 2 diabetes-specific and based on 4,540 patients from the UKPDS trial (1977 to 1991). It  
18 includes HbA<sub>1c</sub> as a continuous variable and calculates the risk of developing a new coronary  
19 heart disease (CHD) event.

## 20 21 Statistical methods

22 The primary outcomes were changes in blood glucose control (HbA<sub>1c</sub>), BP and lipids from  
23 first visit (baseline) to end of treatment (follow-up evaluation visit) and to explore gender  
24 differences in outcomes. Furthermore we investigated how many patients reached the  
25 recommended targets for HbA<sub>1c</sub> (A), BP (B) and LDL cholesterol (C) according to national

1 guidelines (14), collectively referred to as ABC control: HbA<sub>1c</sub> < 7% (< 53 mmol/mol), BP <  
2 130/80 mm Hg and LDL cholesterol < 2.5 mmol/l (< 100 mg/dl, patients without previous  
3 CVD) or < 1.8 mmol/l (< 70 mg/dl, patients with previous CVD). For blood lipids, the T2C  
4 program assumed they would not deteriorate if they were on target at baseline and  
5 measurements were only repeated in case they were not at target at baseline. Accordingly, for  
6 this analysis a last observation carried forward approach was used to impute missing data. *T*  
7 test was used to test for gender differences at baseline or at follow-up. Comparison between  
8 baseline and follow-up was made using mixed model for repeated measurements (MMRM)  
9 for continuous variables adjusting for gender and baseline values and with the subject as a  
10 random effect. For dichotomous variables e.g. pharmacological treatment, logistic regression  
11 models were used adjusting for gender. McNemar test was used to compare changes in  
12 categorical variables. For risk estimates, exact 95%-confidence intervals (CI) were  
13 calculated. SAS Enterprise Guide 7.1 (SAS Institute, Cary, NC) was used for database  
14 management and all of the above-mentioned analyses.

## 16 Results

### 18 Study cohort characteristics

19 Baseline characteristics of the study cohort are shown in Table 1. The majority of patients  
20 were Caucasians, and 19% were diagnosed with diabetes within a year before their referral.  
21 There were more males ( $n = 2,567$ ) than females ( $n = 1,732$ ) but no difference in treatment  
22 duration: median treatment program duration was 8.4 months (IQR: 6.1, 11.3). There were  
23 more male smokers and ex-smokers. Males had a higher level of HbA<sub>1c</sub>, BP, weight and TG  
24 but lower BMI and cholesterol levels at baseline (Table 1).

## 1 Metabolic outcomes

2 There was a significant decrease in HbA<sub>1c</sub> between baseline and follow-up of  $1.0 \pm 0.04\%$   
3 ( $10.6 \pm 0.4$  mmol/mol), with no gender difference. The decrease in systolic BP was  $6.3 \pm 0.4$   
4 mm Hg and in diastolic BP  $2.7 \pm 0.2$  mm Hg ( $p < 0.0001$  for both). The effect of treatment on  
5 BP was the same in both genders. There was a significant decrease in total-cholesterol, LDL  
6 and TG of  $0.39 \pm 0.03$  mmol/l,  $0.32 \pm 0.02$  mmol/l and  $0.22 \pm 0.05$  mmol/l, respectively.  
7 There was no change in HDL levels overall ( $p = 0.2$ ). As expected, females had higher HDL  
8 levels than males, both at baseline and at follow-up ( $p < 0.0001$ ). This gender difference was  
9 also seen for total- and LDL cholesterol levels where females had higher levels at both  
10 baseline and follow-up. The effect of treatment on lipid levels was equal in both genders.

## 12 ABC control

13 In general, the proportion of patients achieving full ABC control according to national  
14 guideline treatment targets increased from 4% to 15% ( $p < 0.0001$ ). More females were  
15 achieving all three treatment targets at both baseline ( $p = 0.047$ ) and at follow-up ( $p = 0.014$ ).  
16 Patients achieving the HbA<sub>1c</sub> target increased from 31% to 58% ( $p < 0.0001$ ), the BP target  
17 from 24% to 34% ( $p < 0.0001$ ), and the LDL target from 52% to 65% ( $p = 0.002$ , Figure 2).  
18 If the BP target was relaxed from  $< 130/80$  mm Hg to  $< 140/85$  mm Hg the percentage  
19 achieving the BP target increased from 43% at baseline to 58% at follow-up ( $p < 0.0001$ ),  
20 and consequently full ABC control from 8% at baseline to 24% at follow-up ( $p < 0.0001$ ).

## 22 Changes in pharmacological treatment

23 The most common antidiabetic drug at baseline was metformin, which 58.4% of the patients  
24 were on, followed by sulphonyl urea (SU), 38.4%, and insulin, 19.5% (Figure 3). Only a  
25 small proportion of patients were on dipeptidyl peptidase 4 (DPP-4) inhibitors, 7.0%,

1 glucagon-like peptide 1 (GLP-1) analogues, 3.9%, or other antidiabetic drug, 4.2%. In  
2 general there was an increase in the use of medication during the program. The largest  
3 increase was seen in use of metformin to 75.3%, insulin to 36.9% and GLP1-analogues to  
4 11.6%. While SU only increased slightly to 41.8%, DPP-4 inhibitors to 9.6% and other  
5 antidiabetics 4.3%.

6 As part of the multifactorial treatment program, we also observed an increase in use of  
7 antihypertensive drugs to 75.3%, lipid lowering drugs to 75.9% and acetylsalicylic acid  
8 (ASA) to 69.6%.

## 9 10 Changes in cardiovascular risk

11 Estimated baseline and follow-up cardiovascular risk according to the used risk engines are  
12 shown in Table 2. Using the Swedish NDR model which predicts the 5 year risk of a new  
13 CVD event in a diabetic population, we observed a relative risk reduction of 15.2% (95% CI:  
14 14.5-15.9). The UKPDS risk engine showed a relative risk reduction of 30.9% (95% CI:  
15 30.3-31.5) in the 5 year CHD risk estimate. Females had a lower risk than males both at  
16 baseline and at follow-up according to both risk models ( $p < 0.0001$ ). Meanwhile, both  
17 according to the Swedish NDR model and the UKPDS risk engine, females had a smaller  
18 relative risk reduction compared to males ( $p < 0.0001$ ).

## 19 20 **Discussion**

21  
22 This study shows that a short term targeted multifactorial treatment program in a specialized  
23 clinical setting can improve metabolic outcome measures and CVD risk in patients with type  
24 2 diabetes and high prevalence of complications. This confirms that multifactorial treatment  
25 not only works in a clinical study setting, but is also feasible and effective in real world

1 clinical practice. With a specialized group of health care providers and a structured treatment  
2 and educational program that focuses on lifestyle intervention, self-management training and  
3 pharmacological treatment of hyperglycaemia, hypertension and dyslipidaemia, it is possible  
4 to accomplish significant CVD risk reductions in a high risk population with diabetes.

## 5 6 ABC control

7 Intensive multifactorial intervention in high risk patients has previously been shown to reduce  
8 CVD and mortality (7), and a recent 21 years follow-up of the Steno-2 study population  
9 shows that patients in the intensive-therapy group survived for a median of 7.9 years longer  
10 than the conventional-therapy group patients (19). Here we show that the same treatment  
11 program also works in clinical practice in a more diverse population, and results in a  
12 substantial reduction of 5- and 10-year CVD risk as estimated by two of the available and  
13 commonly used risk engines. In terms of risk factor intervention, glucose control continuous  
14 to be the greatest challenge to diabetes care. Nonetheless, all but 21% of patients changed  
15 from a higher to a lower HbA<sub>1c</sub> category in this follow-up. Importantly, the improvement in  
16 glycaemic control was not accompanied by a general increase in weight. In fact, although we  
17 found that 15% of those in the normal weight category shifted to the overweight category  
18 when comparing the changes in BMI categories, 15% of those who were in the obese or  
19 overweight category dropped to a lower weight category. The weight gain observed in some  
20 patients is probably explained by the increased use of insulin, while weight loss in others can  
21 be explained by an increased use of GLP-1 receptor agonist treatment in recent years along  
22 with lifestyle management including dietary and physical activity advice.

23  
24 With focus on hyperglycaemia, hypertension and dyslipidaemia, we found an increase in the  
25 proportion of patients achieving the recommended targets that are comparable to intervention

1 studies (20, 21). Here, the relative proportion of patients achieving  $HbA_{1c} < 53$  mmol/mol  
2 (7%) nearly doubled, BP < 130/80 mm Hg increased by 42% and LDL < 2.5 mmol/l by 25%.  
3 The T2C treatment program in this complex high-risk cohort resulted in a higher prevalence  
4 of risk factors in control equal to what has been observed in the more general diabetes  
5 population in the National Health and Nutrition Examination Surveys (NHANES) from 2007  
6 to 2010 (22). The NHANES data differ in the way that their data was cross-sectional with  
7 participants with self-reported diabetes, without any distinction between type 1 and type 2,  
8 and with a different risk profile. Our population was more selected by being referred from  
9 their GP and requiring specialized care, which means they either had more comorbidities or a  
10 more complex treatment than the general patient with type 2 diabetes. For  $HbA_{1c}$  58% in our  
11 cohort achieved the treatment target vs 53% in the NHANES cohort and for LDL-cholesterol  
12 65% vs 56%, respectively. But for BP there was a big difference, 34% in our cohort vs. 51%  
13 in the NHANES cohort. This could be due to a higher prevalence of high BP in this group of  
14 patients selected with complex disease and long diabetes duration. We did observe a time  
15 trend in the data as the proportion of patients achieving the stringent BP target increased from  
16 23% in 2001 to 44% in 2015. The same improvement trend over time was observed in the  
17 proportion of patients achieving all three ABC targets; 7% in 2001 increasing to an average  
18 of 16% from 2006 and forward in our material and in the NHANES data from 7% in 1999-  
19 2002 to 19% in 2007-2010.

## 20 CVD risk

21 To estimate the CVD risk in patients with type 2 diabetes is helpful to follow-up on treatment  
22 and to target further measures to patients at risk. In this study we used two different CVD risk  
23 engines to estimate the effect of the treatment program. The UKPDS risk engine is diabetes-  
24 specific and has several advantages as it incorporates  $HbA_{1c}$  and diabetes duration as  
25

1 continuous variables (12). However, it is still not ideal as it is based on the patients recruited  
2 by UKPDS for randomization in a clinical trial two decades ago before newer and more  
3 effective treatments were available or widely used (e.g. statins, angiotensin converting  
4 enzyme inhibitors and antidiabetic drugs). Accordingly, recent validation showed poor  
5 calibration and overestimation of the CHD risk (23). A model that seems more suitable for  
6 our population is the Swedish NDR risk model, which is based on a more recent and  
7 nationwide population, reflecting a more diverse population and taking into account the  
8 history of previous CVD and BMI. By using this model we found a relative reduction in the  
9 estimated 5-year CVD risk of 16%, after approximately eight months, despite the increase in  
10 age and diabetes duration. Notably, the fact that 26% of the patients had a prior CVD  
11 diagnosis at baseline reflects the high risk profile and complexity of the population that was  
12 referred to the treatment program. This of course does not normalise their actual risk, which  
13 will still be high, but can be a motivating factor for the patients that there are some  
14 modifiable risk factors that can reduce their risk. In comparison, the population used in the  
15 Swedish model had a mean risk of 11.9% and a 5-year risk of fatal/non-fatal CVD of more  
16 than 10% is defined as high risk. According to this 92% of our population was in high risk at  
17 baseline. The UKPDS risk engine which estimates the risk of the first CHD event in 5 or 10  
18 years, gives a lower 5 and 10 year risk estimate at baseline than the Swedish model, 7.4% and  
19 17.1% respectively. This is nearly the same as the 10-year risk found in a NHANES  
20 population from 2007 to 2012 of 16.5% if no risk factors were in control and 10.2% if all risk  
21 factors were in control when using the same risk engine (24).

22 Interestingly, both the NDR and UKPDS risk engines estimated a higher risk reduction in  
23 males than in females. This, perhaps expected finding, could be due to the higher CVD risk in  
24 males at baseline, but could also be due to a relatively greater HbA<sub>1c</sub> reduction seen in males,  
25 which is used in both the NDR and the UKPDS risk engines. However, the gender difference



1 remained significant after excluding HbA<sub>1c</sub> from the equation. This in spite a higher  
2 percentage of females achieved the metabolic targets.

#### 3 4 Strengths and limitations

5 Strengths of this study include the validity of data with repeated recordings of the HbA<sub>1c</sub> and  
6 BP at each visit, and that it includes a large cohort of patients treated under real-life  
7 conditions such that results might have greater external validity than the highly selected  
8 populations in randomized controlled trials (RCT). Still, we cannot rule out that there might  
9 be a selection bias in terms of more motivated patients being referred to the clinic, and by  
10 exclusion of those who did not show up.

11 As a result of using a database and a register, we do not have complete data on all patients  
12 and therefore the cohort size changes a bit as results are based on those without missing  
13 values. Another limitation is that there is a lack of patient reported outcomes, such as adverse  
14 events of drugs and general well-being. This was not possible to extract from the electronic  
15 medical records. Furthermore we cannot be sure that the patients going through a treatment  
16 program actually completed the program or was discharged for other reasons. It is also  
17 important to acknowledge that most of the treatment programs analysed here were completed  
18 before many of the new anti-diabetic treatments, as GLP1-analogs and sodium-glucose co-  
19 transporter 2 (SGLT2)-inhibitors, were widely used and before acceptance of a more  
20 personalized treatment as recommended in the position statement from ADA and EASD in  
21 2012 (16). Another limitation of this study is the use of risk engines that only give an  
22 estimate of the CVD or CHD risk and that UKPDS is based on a population many years prior  
23 to ours and treatment guidelines were not the same.

24 Meanwhile, the data serves as a baseline benchmark for real world data studies as to what can  
25 be achieved in routine clinical practice before these treatments and guidelines get wider use

1 and implementation. The use of a more individualized treatment approach with involvement  
2 of the patient in decision making is increasingly used in the treatment programs at the  
3 moment and is expected to increase adherence to therapy. Furthermore, the combination of a  
4 more individualized HbA<sub>1c</sub> target and a broader selection of antidiabetic, antihypertensive  
5 and dyslipidaemia treatment will likely increase the proportion of patients achieving their  
6 treatment goals and thereby reduce their CVD risk and mortality. Specifically, since the  
7 EMPA-REG OUTCOME trial showed a 38% and the LEADER trial a 22% relative risk  
8 reduction in deaths from CVD events in patients with type 2 diabetes and a high risk of  
9 cardiovascular events (25, 26), this gives us further treatment options in this patient group.  
10 Therefore constant evaluation of the effects of our treatments on the risk of CVD or mortality  
11 is necessary. Combining these drugs, the treatment program evaluated here, and an  
12 individualized approach would be a logical next step for future studies.

## 13 14 Conclusion

15 This study of patients with type 2 diabetes who undergo structured treatment program lasting  
16 less than one year show that it is possible to increase the proportion of patients achieving the  
17 target levels for HbA<sub>1c</sub>, BP, and LDL, thereby reducing their estimated CVD and CHD risk.  
18 To the strengths of such a structured program we count the focus on treatment targets by a  
19 multidisciplinary team and the fact that it is time limited, which reduces clinical inertia and  
20 costs. Our results show that intensive treatment is not only effective in the RCT setting, but  
21 also in clinical practice and should encourage other health care systems to establish similar  
22 programs.

23

24

1

**2 Conflicts of interest**

3 NS, BC and HV were employed at Steno Diabetes Center A/S, now known as Steno Diabetes  
4 Center Copenhagen and MR was employed there when the study was initiated. Steno  
5 Diabetes Center A/S was a research hospital working in the Danish National Health Service  
6 and owned by Novo Nordisk A/S. NS and BC own shares in Novo Nordisk A/S.

**7 Funding**

8 This study has been funded by Innovation Fund Denmark

**9 Contribution statement**

10 NS and BC were responsible for data management and statistical analysis. NS and MR were  
11 responsible for interpretation of data and writing of the article. HV was responsible  
12 interpretation and critical revision of the article. All authors fully approved the final version  
13 of the article.

**14 Data sharing statement**

15 Clinical data will be available at request, but information on diagnosis and medication is not  
16 allowed to be shared by the Danish National Patient Register or Statistics Denmark.

17

**18 Uncategorized References**

- 19 1. Guariguata L, Whiting DR, Hambleton I, Beagley J, Linnenkamp U, Shaw JE.  
20 Global estimates of diabetes prevalence for 2013 and projections for 2035. *Diabetes*  
21 *research and clinical practice*. 2014;103(2):137-49.
- 22 2. Sarwar N, Gao P, Seshasai SR, Gobin R, Kaptoge S, Di Angelantonio E, et  
23 al. Diabetes mellitus, fasting blood glucose concentration, and risk of vascular disease: a  
24 collaborative meta-analysis of 102 prospective studies. *Lancet*. 2010;375(9733):2215-  
25 22.
- 26 3. Holman RR, Paul SK, Bethel MA, Matthews DR, Neil HA. 10-year follow-up of  
27 intensive glucose control in type 2 diabetes. *The New England journal of medicine*.  
28 2008;359(15):1577-89.
- 29 4. UKPDS. Effect of intensive blood-glucose control with metformin on  
30 complications in overweight patients with type 2 diabetes (UKPDS 34). *UK Prospective*  
31 *Diabetes Study (UKPDS) Group. Lancet*. 1998;352(9131):854-65.
- 32 5. Gaede P, Vedel P, Larsen N, Jensen GV, Parving HH, Pedersen O.  
33 Multifactorial intervention and cardiovascular disease in patients with type 2 diabetes.  
34 *The New England journal of medicine*. 2003;348(5):383-93.

- 1 6. UKPDS. Intensive blood-glucose control with sulphonylureas or insulin  
2 compared with conventional treatment and risk of complications in patients with type 2  
3 diabetes (UKPDS 33). UK Prospective Diabetes Study (UKPDS) Group. *Lancet*.  
4 1998;352(9131):837-53.
- 5 7. Gaede P, Lund-Andersen H, Parving HH, Pedersen O. Effect of a  
6 multifactorial intervention on mortality in type 2 diabetes. *The New England journal of*  
7 *medicine*. 2008;358(6):580-91.
- 8 8. IDF Clinical Guidelines Task Force. Global guideline for Type 2  
9 diabetes. . Brussels: International Diabetes Federation; 2005.
- 10 9. Authors/Task Force M, Ryden L, Grant PJ, Anker SD, Berne C, Cosentino F,  
11 et al. ESC Guidelines on diabetes, pre-diabetes, and cardiovascular diseases developed  
12 in collaboration with the EASD: the Task Force on diabetes, pre-diabetes, and  
13 cardiovascular diseases of the European Society of Cardiology (ESC) and developed in  
14 collaboration with the European Association for the Study of Diabetes (EASD). *Eur Heart*  
15 *J*. 2013;34(39):3035-87.
- 16 10. Kotseva K, Wood D, De Backer G, De Bacquer D, Pyorala K, Reiner Z, et al.  
17 EUROASPIRE III. Management of cardiovascular risk factors in asymptomatic high-risk  
18 patients in general practice: cross-sectional survey in 12 European countries. *Eur J*  
19 *Cardiovasc Prev Rehabil*. 2010;17(5):530-40.
- 20 11. Alonso-Fernandez M, Mancera-Romero J, Mediavilla-Bravo JJ, Comas-  
21 Samper JM, Lopez-Simarro F, Perez-Unanua MP, et al. Glycemic control and use of A1c  
22 in primary care patients with type 2 diabetes mellitus. *Prim Care Diabetes*.  
23 2015;9(5):385-91.
- 24 12. Stevens RJ, Kothari V, Adler AI, Stratton IM, United Kingdom Prospective  
25 Diabetes Study G. The UKPDS risk engine: a model for the risk of coronary heart disease  
26 in Type II diabetes (UKPDS 56). *Clin Sci (Lond)*. 2001;101(6):671-9.
- 27 13. Zethelius B, Eliasson B, Eeg-Olofsson K, Svensson AM, Gudbjornsdottir S,  
28 Cederholm J, et al. A new model for 5-year risk of cardiovascular disease in type 2  
29 diabetes, from the Swedish National Diabetes Register (NDR). *Diabetes research and*  
30 *clinical practice*. 2011;93(2):276-84.
- 31 14. Sundhedsstyrelsen CfEoMT. Type 2-diabetes. Medicinsk teknologivurdering  
32 af screening, diagnostik og behandling 2003 [Available from:  
33 <https://www.sst.dk/~media/F42943CEAEC743DDAD8CB57FF55C9581.ashx>.  
34
- 35 15. Snorgaard O DT, Breum L et al. Farmakologisk behandling af type 2-  
36 diabetes – mål og algoritmer - 2014 2014 [Available from:  
37 <http://www.endocrinology.dk/PDF/FarmakologiskbehandlingDM2rev2014.pdf>.  
38
- 39 16. Inzucchi SE, Bergenstal RM, Buse JB, Diamant M, Ferrannini E, Nauck M, et  
40 al. Management of hyperglycaemia in type 2 diabetes: a patient-centered approach.  
41 Position statement of the American Diabetes Association (ADA) and the European  
42 Association for the Study of Diabetes (EASD). *Diabetologia*. 2012;55(6):1577-96.
- 43 17. Bloom S, Till S, Sonksen P, Smith S. Use of a biothesiometer to measure  
44 individual vibration thresholds and their variation in 519 non-diabetic subjects. *Br Med J*  
45 *(Clin Res Ed)*. 1984;288(6433):1793-5.
- 46 18. Kildemoes HW, Sorensen HT, Hallas J. The Danish National Prescription  
47 Registry. *Scand J Public Health*. 2011;39(7 Suppl):38-41.
- 48 19. Gaede P, Oellgaard J, Carstensen B, Rossing P, Lund-Andersen H, Parving  
49 HH, et al. Years of life gained by multifactorial intervention in patients with type 2  
50 diabetes mellitus and microalbuminuria: 21 years follow-up on the Steno-2 randomised  
51 trial. *Diabetologia*. 2016.
- 52 20. Tight blood pressure control and risk of macrovascular and microvascular  
53 complications in type 2 diabetes: UKPDS 38. UK Prospective Diabetes Study Group. *BMJ*.  
54 1998;317(7160):703-13.
- 55 21. Griffin SJ, Borch-Johnsen K, Davies MJ, Khunti K, Rutten GE, Sandbaek A,  
56 et al. Effect of early intensive multifactorial therapy on 5-year cardiovascular outcomes  
in individuals with type 2 diabetes detected by screening (ADDITION-Europe): a cluster-  
randomised trial. *Lancet*. 2011;378(9786):156-67.

- 1  
2  
3 1 22. Stark Casagrande S, Fradkin JE, Saydah SH, Rust KF, Cowie CC. The  
4 2 prevalence of meeting A1C, blood pressure, and LDL goals among people with diabetes,  
5 3 1988-2010. *Diabetes Care*. 2013;36(8):2271-9.  
6 4 23. Bannister CA, Poole CD, Jenkins-Jones S, Morgan CL, Elwyn G, Spasic I, et  
7 5 al. External validation of the UKPDS risk engine in incident type 2 diabetes: a need for  
8 6 new type 2 diabetes-specific risk equations. *Diabetes Care*. 2014;37(2):537-45.  
9 7 24. Wong ND, Patao C, Malik S, Iloeje U. Preventable coronary heart disease  
10 8 events from control of cardiovascular risk factors in US adults with diabetes (projections  
11 9 from utilizing the UKPDS risk engine). *Am J Cardiol*. 2014;113(8):1356-61.  
12 10 25. Zinman B, Wanner C, Lachin JM, Fitchett D, Bluhmki E, Hantel S, et al.  
13 11 Empagliflozin, Cardiovascular Outcomes, and Mortality in Type 2 Diabetes. *The New*  
14 12 *England journal of medicine*. 2015;373(22):2117-28.  
15 13 26. Marso SP, Daniels GH, Brown-Frandsen K, Kristensen P, Mann JF, Nauck  
16 14 MA, et al. Liraglutide and Cardiovascular Outcomes in Type 2 Diabetes. *The New England*  
17 15 *journal of medicine*. 2016;375(4):311-22.  
18  
19  
20  
21  
22  
23  
24  
25  
26

## 20 **Figure legends**

21 Figure 1 - Flow chart of the treatment program. Visit A: Visit at the laboratory, eye clinic and  
22 consultation with nurse. Visit B: Consultation with nurse, dietician and physician. Visit C1  
23 and C2: Individual program with nurse. Group sessions: Module A: 'Me and my diabetes'.  
24 Module B: 'My feet and physical activity'. Module C: 'My diet'. Module D: 'My motivation  
25 and future lifestyle plans'. Visit C: Consultation with nurse and dietician. Visit D: Final visit  
26 with nurse, dietician and endocrinologist. After approximately 8 months patients with no  
27 complications are referred back to general practice and those with micro- or macrovascular  
28 complications are referred to the outpatient clinic.

29  
30 Figure 2 - Proportion of patients achieving the treatment targets for HbA<sub>1c</sub>, LDL cholesterol,  
31 systolic and diastolic blood pressure at baseline and at follow-up.

32  
33 Figure 3 - Proportion of patients on pharmacological treatment at baseline and follow-up.

**Table 1 Baseline characteristics of the study cohort**

|                                         | N     | All             | Females ( <i>n</i> = 1,732) | Males ( <i>n</i> = 2,567) |
|-----------------------------------------|-------|-----------------|-----------------------------|---------------------------|
| Age (years)                             | 4,299 | 59.3 (12.4)     | 59.9 (12.9)                 | 58.9 (12.1)               |
| Weight (kg)                             | 4,256 | 91.5 (21.2)     | 84.4 (20.4)                 | 96.3 (20.4)               |
| Body mass index (kg/m <sup>2</sup> )    | 4,236 | 31.0 (6.6)      | 31.8 (7.4)                  | 30.3 (4.4)                |
| Smokers, N (%)                          | 4,071 | 1,629 (37.9)    | 622 (35.9)                  | 1,007 (39.5)              |
| Caucasians, N (%)                       | 4,289 | 3,724 (87)      | 1,457 (84)                  | 2,267 (89)                |
| Diabetes and complications              |       |                 |                             |                           |
| Duration of type 2 diabetes (years)     | 4,252 | 7.1 (6.5)       | 7.3 (6.6)                   | 6.9 (6.5)                 |
| Diabetes duration < 1 year, N (%)       | 4,252 | 828 (19.5)      | 311 (18.1)                  | 517 (20.4)                |
| GAD65 antibodies ≥25 U/mL, N (%)        | 2,376 | 116 (2.7)       | 59 (3.4)                    | 57 (2.2)                  |
| HbA <sub>1c</sub> (%)                   | 4,253 | 8.2 (3.9)       | 8.1 (3.9)                   | 8.2 (19)                  |
| HbA <sub>1c</sub> (mmol/mol)            | 4,253 | 66 (19)         | 65 (19)                     | 66 (19)                   |
| Fasting p-glucose (mmol/L)              | 2,850 | 9.9 (3.6)       | 9.6 (3.4)                   | 10.0 (3.7)                |
| Fasting c-peptide (pmol/L) Median (IQR) | 2,898 | 1050 (706-1500) | 1050 (699–1517)             | 1050 (711-1478)           |
| Prior cardiovascular disease, N (%)†    | 4,299 | 1,127 (26)      | 400 (23)                    | 727 (28)                  |
| Microalbuminuria, N (%)                 | 4,299 | 787 (18)        | 254 (15)                    | 533 (21)                  |
| Macroalbuminuria, N (%)                 | 4,299 | 211 (5)         | 47 (3)                      | 164 (6)                   |
| eGFR (mL/min)                           | 1,335 | 78 (17)         | 77 (18)                     | 79 (16)                   |
| Simple retinopathy, N (%)               | 3,859 | 1134 (29)       | 422 (27)                    | 712 (31)                  |
| Proliferative retinopathy, N (%)        | 3,859 | 56 (1)          | 25 (2)                      | 31 (1)                    |
| Peripheral neuropathy, N (%)            | 2,343 | 549 (23)        | 140 (15)                    | 409 (29)                  |
| Blood pressure                          |       |                 |                             |                           |
| Systolic blood pressure (mm Hg)         | 4,280 | 141.7 (21.7)    | 140.5 (22.5)                | 142.6 (21.1)              |

**Table 1 Baseline characteristics of the study cohort**

|                                     | N     | All           | Females ( <i>n</i> = 1,732) | Males ( <i>n</i> = 2,567) |
|-------------------------------------|-------|---------------|-----------------------------|---------------------------|
| Diastolic blood pressure (mm Hg)    | 4,280 | 82.5 (11.5)   | 80.8 (11.4)                 | 83.6 (11.5)               |
| Lipids                              |       |               |                             |                           |
| Total cholesterol (mmol/L)          | 3,946 | 4.7 (1.2)     | 4.9 (1.3)                   | 4.6 (1.2)                 |
| LDL cholesterol (mmol/L)            | 3,946 | 2.5 (1.0)     | 2.6 (1.0)                   | 2.5 (1.0)                 |
| HDL cholesterol (mmol/L)            | 3,946 | 1.2 (0.4)     | 1.3 (0.4)                   | 1.2 (0.4)                 |
| Triglycerides (mmol/L) Median (IQR) | 3,946 | 1.7 (1.2–2.5) | 1.7 (1.2–2.5)               | 1.7 (1.2–2.6)             |
| Medication                          |       |               |                             |                           |
| Metformin, N (%)                    | 4,299 | 2511 (58)     | 1025 (59)                   | 1486 (58)                 |
| Sulfonylurea, N (%)                 | 4,299 | 1652 (38)     | 673 (39)                    | 979 (38)                  |
| DPP-4 inhibitor, N (%)              | 4,299 | 303 (7)       | 126 (7)                     | 177 (7)                   |
| GLP-1 analogue, N (%)               | 4,299 | 168 (4)       | 73 (4)                      | 95 (4)                    |
| Insulin, N (%)                      | 4,299 | 836 (19)      | 346 (20)                    | 490 (19)                  |
| Other OAD, N (%)                    | 4,299 | 179 (4)       | 67 (4)                      | 112 (4)                   |
| RAS blockade, N (%)                 | 4,299 | 2027 (47)     | 736 (17)                    | 1291(30)                  |
| All antihypertensive drugs, N (%)   | 4,299 | 2678 (62)     | 1099 (26)                   | 1579 (37)                 |
| Lipid lowering drug, N (%)          | 4,299 | 1988 (46)     | 776 (45)                    | 1212 (47)                 |
| Acetylsalicylic acid, N (%)         | 4,299 | 1538 (36)     | 530 (31)                    | 1008 (39)                 |

Values are means (SDs) unless stated otherwise.

†Prior CVD was defined as one or more of the following: myocardial infarction, heart surgery, ischaemic heart disease, heart insufficiency, vascular surgery, stroke, transitory cerebral ischaemia, amputation.

CVD, cardiovascular disease; GAD, glutamic acid decarboxylase; HbA<sub>1c</sub>, haemoglobin A<sub>1c</sub>; HDL, high-density lipoprotein; LDL, low-density lipoprotein; DPP-4, Dipeptidyl peptidase 4; GLP-1, Glucagon-like peptide 1; OAD, oral antidiabetic drug; RAS, Renin angiotensin system.

**Table 2 Estimated CVD or CHD risk**

|                                                | Baseline                      | Follow-up                       |
|------------------------------------------------|-------------------------------|---------------------------------|
| Estimated CVD 5-year risk: NDR Risk engine:    |                               |                                 |
| All                                            | 29.8 (19.6-44.6) <sup>a</sup> | 25.0 (16.6-37.4) <sup>b,*</sup> |
| F                                              | 24.9 (15.9-37.0)              | 21.1 (13.7-31.1)*               |
| M                                              | 34.0 (22.6-48.2)              | 28.1 (19.1-41.2)*               |
| Estimated CHD 5-year risk: UKPDS Risk Engine:  |                               |                                 |
| All                                            | 7.4 (3.9-13.7) <sup>c</sup>   | 5.0 (2.7-9.2) <sup>d,*</sup>    |
| F                                              | 4.8 (2.6-8.7)                 | 3.3 (1.9-5.9)*                  |
| M                                              | 9.6 (5.3-16.7)                | 6.4 (3.7-11.3)*                 |
| Estimated CHD 10-year risk: UKPDS Risk Engine: |                               |                                 |
| All                                            | 17.1 (9.3-30.4) <sup>c</sup>  | 11.8 (6.5-21.1) <sup>d,*</sup>  |
| F                                              | 11.4 (6.1-20.0)               | 7.9 (4.5-14.0)*                 |
| M                                              | 22.1 (12.6-36.2)              | 15.0 (9.0-25.4)*                |

Estimated CVD risk according to the Swedish National Register (NDR) risk engine and the estimated CHD risk according to the UKPDS risk engine. Data is median risk in % (IQR).

a  $n = 3,865$ ; b  $n = 3,730$ ; c  $n = 3,895$ ; d  $n = 3,757$ , \*  $P < 0.0001$ .





Figure 1 - Flow chart of the treatment program. Visit A: Visit at the laboratory, eye clinic and consultation with nurse. Visit B: Consultation with nurse, dietician and physician. Visit C1 and C2: Individual program with nurse. Group sessions: Module A: 'Me and my diabetes'. Module B: 'My feet and physical activity'. Module C: 'My diet'. Module D: 'My motivation and future lifestyle plans'. Visit C: Consultation with nurse and dietician. Visit D: Final visit with nurse, dietician and endocrinologist. After approximately 8 months patients with no complications are referred back to general practice and those with micro- or macrovascular complications are referred to the outpatient clinic.

121x170mm (300 x 300 DPI)



Figure 2 - Proportion of patients achieving the treatment targets for HbA1c, LDL cholesterol, systolic and diastolic blood pressure at baseline and at follow-up.

183x174mm (300 x 300 DPI)





Figure 3 - Proportion of patients on pharmacological treatment at baseline and follow-up.

156x120mm (300 x 300 DPI)

**STROBE 2007 (v4) Statement—Checklist of items that should be included in reports of *cohort studies***

| Section/Topic                | Item # | Recommendation                                                                                                                                                                       | Reported on page # |
|------------------------------|--------|--------------------------------------------------------------------------------------------------------------------------------------------------------------------------------------|--------------------|
| Title and abstract           | 1      | (a) Indicate the study's design with a commonly used term in the title or the abstract                                                                                               | 1                  |
|                              |        | (b) Provide in the abstract an informative and balanced summary of what was done and what was found                                                                                  | 2                  |
| <b>Introduction</b>          |        |                                                                                                                                                                                      |                    |
| Background/rationale         | 2      | Explain the scientific background and rationale for the investigation being reported                                                                                                 | 4                  |
| Objectives                   | 3      | State specific objectives, including any prespecified hypotheses                                                                                                                     | 4-5                |
| <b>Methods</b>               |        |                                                                                                                                                                                      |                    |
| Study design                 | 4      | Present key elements of study design early in the paper                                                                                                                              | 5-6                |
| Setting                      | 5      | Describe the setting, locations, and relevant dates, including periods of recruitment, exposure, follow-up, and data collection                                                      | 5-6                |
| Participants                 | 6      | (a) Give the eligibility criteria, and the sources and methods of selection of participants. Describe methods of follow-up                                                           | 6                  |
|                              |        | (b) For matched studies, give matching criteria and number of exposed and unexposed                                                                                                  |                    |
| Variables                    | 7      | Clearly define all outcomes, exposures, predictors, potential confounders, and effect modifiers. Give diagnostic criteria, if applicable                                             | 6-7                |
| Data sources/<br>measurement | 8*     | For each variable of interest, give sources of data and details of methods of assessment (measurement). Describe comparability of assessment methods if there is more than one group | 6-7                |
| Bias                         | 9      | Describe any efforts to address potential sources of bias                                                                                                                            |                    |
| Study size                   | 10     | Explain how the study size was arrived at                                                                                                                                            |                    |
| Quantitative variables       | 11     | Explain how quantitative variables were handled in the analyses. If applicable, describe which groupings were chosen and why                                                         | 6-7                |
| Statistical methods          | 12     | (a) Describe all statistical methods, including those used to control for confounding                                                                                                | 8                  |
|                              |        | (b) Describe any methods used to examine subgroups and interactions                                                                                                                  | 8                  |
|                              |        | (c) Explain how missing data were addressed                                                                                                                                          | 8                  |
|                              |        | (d) If applicable, explain how loss to follow-up was addressed                                                                                                                       |                    |
|                              |        | (e) Describe any sensitivity analyses                                                                                                                                                |                    |
| <b>Results</b>               |        |                                                                                                                                                                                      |                    |

|                          |     |                                                                                                                                                                                                              |              |
|--------------------------|-----|--------------------------------------------------------------------------------------------------------------------------------------------------------------------------------------------------------------|--------------|
| Participants             | 13* | (a) Report numbers of individuals at each stage of study—eg numbers potentially eligible, examined for eligibility, confirmed eligible, included in the study, completing follow-up, and analysed            | 6            |
|                          |     | (b) Give reasons for non-participation at each stage                                                                                                                                                         | 6            |
|                          |     | (c) Consider use of a flow diagram                                                                                                                                                                           |              |
| Descriptive data         | 14* | (a) Give characteristics of study participants (eg demographic, clinical, social) and information on exposures and potential confounders                                                                     | 9            |
|                          |     | (b) Indicate number of participants with missing data for each variable of interest                                                                                                                          | 21 (Table 1) |
|                          |     | (c) Summarise follow-up time (eg, average and total amount)                                                                                                                                                  | 9            |
| Outcome data             | 15* | Report numbers of outcome events or summary measures over time                                                                                                                                               | 9-10         |
| Main results             | 16  | (a) Give unadjusted estimates and, if applicable, confounder-adjusted estimates and their precision (eg, 95% confidence interval). Make clear which confounders were adjusted for and why they were included | 9-10         |
|                          |     | (b) Report category boundaries when continuous variables were categorized                                                                                                                                    | 9-10         |
|                          |     | (c) If relevant, consider translating estimates of relative risk into absolute risk for a meaningful time period                                                                                             |              |
| Other analyses           | 17  | Report other analyses done—eg analyses of subgroups and interactions, and sensitivity analyses                                                                                                               |              |
| <b>Discussion</b>        |     |                                                                                                                                                                                                              |              |
| Key results              | 18  | Summarise key results with reference to study objectives                                                                                                                                                     | 11           |
| <b>Limitations</b>       |     |                                                                                                                                                                                                              |              |
| Interpretation           | 20  | Give a cautious overall interpretation of results considering objectives, limitations, multiplicity of analyses, results from similar studies, and other relevant evidence                                   | 12-14        |
| Generalisability         | 21  | Discuss the generalisability (external validity) of the study results                                                                                                                                        | 14-15        |
| <b>Other information</b> |     |                                                                                                                                                                                                              |              |
| Funding                  | 22  | Give the source of funding and the role of the funders for the present study and, if applicable, for the original study on which the present article is based                                                | 17           |

\*Give information separately for cases and controls in case-control studies and, if applicable, for exposed and unexposed groups in cohort and cross-sectional studies.

**Note:** An Explanation and Elaboration article discusses each checklist item and gives methodological background and published examples of transparent reporting. The STROBE checklist is best used in conjunction with this article (freely available on the Web sites of PLoS Medicine at <http://www.plosmedicine.org/>, Annals of Internal Medicine at <http://www.annals.org/>, and Epidemiology at <http://www.epidem.com/>). Information on the STROBE Initiative is available at [www.strobe-statement.org](http://www.strobe-statement.org).
